# Supplementary material for: Direct oxidative nitration of aromatic sulfonamides under mild conditions
Source: Royal Society of Chemistry journal article supplement (doi:10.1039/c4cc03784g), 2014-01-01
Supplement: c4cc03784g1.pdf [file c4cc03784g1.pdf]

**Supporting Information**  
**Direct nitration of aromatic sulfonamides with**  
**sodium nitrite**

Ying-Xiu Li<sup>a</sup>, Lian-Hua Li<sup>a</sup>, Yan-Fang Yang<sup>a</sup>, Hui-Liang Hua<sup>a</sup>, Xiao-Biao Yan<sup>a</sup>, Lian-Biao  
Zhao<sup>b</sup>, Jin-Bang Zhang<sup>a</sup>, Fa-Jin Ji<sup>c</sup> and Yong-Min Liang<sup>a,\*</sup>

*State Key Laboratory of Applied Organic Chemistry, Lanzhou University, Lanzhou  
730000, P.R. China.*

*E-mail: liangym@lzu.edu.cn*

**Table of Contents**

|          |                                                                           |                |
|----------|---------------------------------------------------------------------------|----------------|
| <b>1</b> | <b>General Remarks</b>                                                    | <b>S2</b>      |
| <b>2</b> | <b>General experimental procedure</b>                                     | <b>S2</b>      |
| <b>3</b> | <b>Optimization of the reaction conditions</b>                            | <b>S3</b>      |
| <b>4</b> | <b>Characterization data of products 2a-2v</b>                            | <b>S4- S12</b> |
| <b>5</b> | <b>Crystallographic data of 2a</b>                                        | <b>S13</b>     |
| <b>6</b> | <b><sup>1</sup>H NMR, <sup>13</sup>C NMR, Spectra for compounds 2a-2v</b> | <b>S14-S45</b> |
| <b>7</b> | <b>Electron paramagnetic resonance (EPR) for 2a</b>                       | <b>S46-S47</b> |

## 1. General Remarks

Column chromatography was carried out on silica gel.  $^1\text{H}$  NMR spectra were recorded on 400 MHz in  $\text{CDCl}_3$  and  $^{13}\text{C}$  NMR spectra were recorded on 400 MHz in  $\text{CDCl}_3$ . IR spectra were recorded on a FT-IR spectrometer and only major peaks are reported in  $\text{cm}^{-1}$ . Melting points were determined on a microscopic apparatus and were uncorrected. All compounds were further characterized by HRMS; copies of their  $^1\text{H}$  NMR and  $^{13}\text{C}$  NMR spectra are provided in the Supporting Information. Room temperature is 20–25°C. Commercially available reagents and solvents were used without further purification.

## 2. General experimental procedure

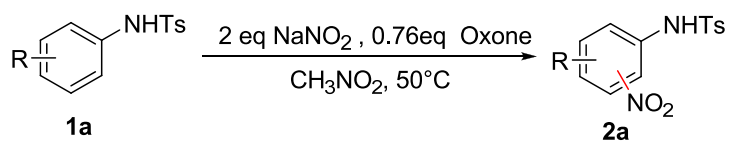

A mixture of aromatic sulfonamide derivative (0.3 mmol) **1a**, 2 eq  $\text{NaNO}_2$  (41.4 mg, 0.6 mmol), 2 eq  $\text{KHS}_2\text{O}_8$  (139.2 mg, 0.6 mmol) and nitromethane (3.0 mL) was stirred at 50°C under air for 3 h. The reaction was concentrated. The residue was purified by flash column chromatography using mixture of petroleum ether and ethyl acetate as eluent to afford the corresponding product **2** as a yellow solid.

### 3. Optimization of the reaction conditions

**Table SI** Optimization of the reaction conditions<sup>a</sup>

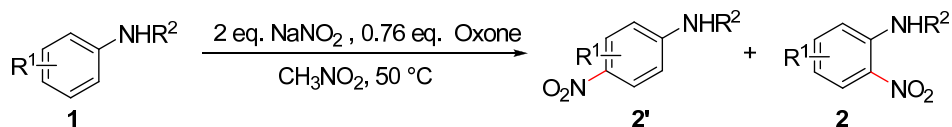

R<sup>1</sup> = H, CH<sub>3</sub>, X, NO<sub>2</sub>, OCF<sub>3</sub>, OR

R<sup>2</sup> = Ts, Ac, Boc, CPh, CO(CH<sub>3</sub>)<sub>3</sub>, Bn, CH<sub>3</sub>

| Entry     | R <sup>2</sup>                      | Oxidant<br>[eq.]                                                  | Solvent                             | Temp.<br>[°C] | t [h]    | Yield [%] <sup>b</sup> |
|-----------|-------------------------------------|-------------------------------------------------------------------|-------------------------------------|---------------|----------|------------------------|
| 1         | -TS                                 | PhI(OAc) <sub>2</sub> (3)                                         | DCM                                 | r.t.          | 3        | 82                     |
| 2         | -TS                                 | DDQ (3)                                                           | DCM                                 | r.t.          | 36       | 67                     |
| 3         | -TS                                 | BQ (3)                                                            | DCM                                 | r.t.          | 36       | NR                     |
| 4         | -TS                                 | PPTS (3)                                                          | DCM                                 | r.t.          | 36       | 8                      |
| 5         | -TS                                 | (NH <sub>4</sub> ) <sub>2</sub> S <sub>2</sub> O <sub>8</sub> (2) | DCM                                 | r.t.          | 36       | 30                     |
| 6         | -TS                                 | Oxone (0.76)                                                      | DCM                                 | r.t.          | 36       | 86                     |
| 7         | -TS                                 | Oxone (0.76)                                                      | DCE                                 | r.t.          | 36       | 42                     |
| 8         | -TS                                 | Oxone (0.76)                                                      | CH <sub>3</sub> NO <sub>2</sub>     | r.t.          | 36       | 83                     |
| 9         | -TS                                 | Oxone (0.76)                                                      | CH <sub>3</sub> CN                  | r.t.          | 36       | 48                     |
| 10        | -TS                                 | Oxone (0.76)                                                      | Toluene                             | r.t.          | 36       | 41                     |
| 11        | -TS                                 | Oxone (0.76)                                                      | THF                                 | r.t.          | 36       | NR                     |
| 12        | -TS                                 | Oxone (0.76)                                                      | 1,4-Dioxane                         | r.t.          | 36       | 26                     |
| 13        | -TS                                 | Oxone (0.76)                                                      | DMF                                 | r.t.          | 36       | 19                     |
| 14        | -TS                                 | Oxone (0.76)                                                      | DMSO                                | r.t.          | 28       | NR                     |
| 15        | -TS                                 | Oxone (0.76)                                                      | CH <sub>3</sub> OH                  | r.t.          | 36       | 28                     |
| 16        | -TS                                 | Oxone (0.76)                                                      | CH <sub>3</sub> NO <sub>2</sub>     | r.t.          | 36       | 98                     |
| 17        | -Ac                                 | Oxone (0.76)                                                      | CH <sub>3</sub> NO <sub>2</sub>     | r.t.          | 36       | 52                     |
| 18        | -Boc                                | Oxone (0.76)                                                      | CH <sub>3</sub> NO <sub>2</sub>     | r.t.          | 36       | 26                     |
| 19        | -COPh                               | Oxone (0.76)                                                      | CH <sub>3</sub> NO <sub>2</sub>     | r.t.          | 36       | 58                     |
| 20        | -COC(CH <sub>3</sub> ) <sub>3</sub> | Oxone (0.76)                                                      | CH <sub>3</sub> NO <sub>2</sub>     | r.t.          | 36h      | 52                     |
| 21        | -Bn                                 | Oxone (0.76)                                                      | CH <sub>3</sub> NO <sub>2</sub>     | r.t.          | 36       | 48                     |
| 22        | -CH <sub>3</sub>                    | Oxone (0.76)                                                      | CH <sub>3</sub> NO <sub>2</sub>     | r.t.          | 36       | 41                     |
| <b>23</b> | <b>-TS</b>                          | <b>Oxone (0.76)</b>                                               | <b>CH<sub>3</sub>NO<sub>2</sub></b> | <b>50</b>     | <b>2</b> | <b>98</b>              |

<sup>a</sup> Conditions: 0.3 mmol **1a**, 0.6 mmol NaNO<sub>2</sub> and oxidant in nitromethane (3 mL) at RT to 50 °C. <sup>b</sup> Isolated yield.

#### 4. Characterization Data of 2a-2v

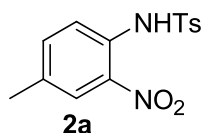

**4-Methyl-N-(4-methyl-2-nitrophenyl)benzenesulfonamide (2a):** 98% yield; yellow solid; mp: 99–101 °C;  $^1\text{H}$  NMR (400 MHz,  $\text{CDCl}_3$ )  $\delta$  ppm 9.64 (s, 1H), 7.87 (s, 1H), 7.74-7.67 (m, 3H), 7.40-7.38 (d,  $J = 8.8$  Hz, 3H), 7.27-7.23 (m, 2H);  $^{13}\text{C}$  NMR (100 MHz,  $\text{CDCl}_3$ )  $\delta$  ppm 144.6, 137.2, 136.7, 135.6, 134.5, 131.2, 129.9, 127.1, 125.9, 121.4; IR (KBr,  $\text{cm}^{-1}$ ) 3292, 1533, 1348, 1168; HRMS (ESI) Calcd for  $\text{C}_{14}\text{H}_{14}\text{N}_2\text{O}_4\text{S}$ :  $\text{M}+\text{Na} = 329.0566$ ; found: 329.0561.

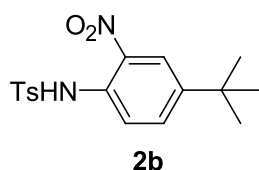

**N-(4-tert-butyl-2-nitrophenyl)-4-methylbenzenesulfonamide (2b):** 63% yield; yellow solid; mp: 121–123 °C;  $^1\text{H}$  NMR (400 MHz,  $\text{CDCl}_3$ )  $\delta$  ppm 9.75 (s, 1H), 8.09-8.08 (d,  $J = 4.0$  Hz, 1H), 7.75-7.73 (d, 3H), 7.63-7.60 (dd,  $J_1 = 2.4$  Hz,  $J_2 = 6.4$  Hz, 1H), 7.28-7.26 (d,  $J = 8.0$  Hz, 2H), 2.39 (s, 3H), 1.29 (s, 9H);  $^{13}\text{C}$  NMR (100 MHz,  $\text{CDCl}_3$ )  $\delta$  ppm 147.5, 144.6, 136.7, 135.9, 133.3, 131.3, 129.9, 127.2, 122.5, 120.7, 34.5, 30.8, 21.5; IR (KBr,  $\text{cm}^{-1}$ ) 3289, 1158, 543; HRMS (ESI) Calcd for  $\text{C}_{17}\text{H}_{20}\text{N}_2\text{O}_4\text{S}$ :  $\text{M}+\text{Na} = 371.1036$ ; found: 371.1031.

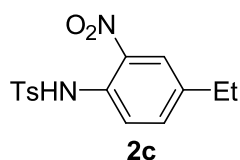

**N-(4-ethyl-2-nitrophenyl)-4-methylbenzenesulfonamide (2c):** 97% yield; yellow oil;  $^1\text{H}$  NMR (400 MHz,  $\text{CDCl}_3$ )  $\delta$  ppm 9.69 (s, 1H), 7.91-7.90 (d,  $J = 1.2$  Hz, 1H), 7.76-7.70 (m, 3H), 7.44-7.41 (dd,  $J_1 = 2.0$  Hz,  $J_2 = 6.4$  Hz, 1H), 7.27-7.24 (m, 2H), 2.67-2.61 (q,  $J = 3.6$  Hz, 2H), 2.38 (s, 3H), 1.24-1.20 (t,  $J = 3.6$  Hz, 3H);  $^{13}\text{C}$  NMR (100 MHz,  $\text{CDCl}_3$ )  $\delta$  ppm 144.6, 140.5, 137.2, 135.7, 135.6, 131.4, 129.9, 127.1, 124.7, 121.4, 27.7, 21.5, 14.8; IR (KBr,  $\text{cm}^{-1}$ ) 3292, 1169, 548; HRMS (ESI) Calcd for  $\text{C}_{15}\text{H}_{16}\text{N}_2\text{O}_4\text{S}$ :  $\text{M}+\text{Na} = 343.0723$ ; found: 343.0716.

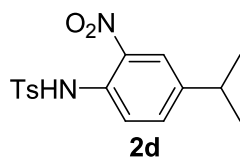

***N*-(4-isopropyl-2-nitrophenyl)-4-methylbenzenesulfonamide (2d):** 97% yield; yellow solid; mp: 176–178 °C;  $^1\text{H}$  NMR (400 MHz,  $\text{CDCl}_3$ )  $\delta$  ppm 8.23 (s, 1H), 7.98 (s, 2H), 7.49-7.43 (d,  $J = 8.4$  Hz, 2H), 7.24-7.22 (d,  $J = 8.4$  Hz, 2H), 3.13-3.03 (m, 1H), 2.43 (s, 3H), 1.33 (s, 3H), 1.32 (s, 3H);  $^{13}\text{C}$  NMR (100 MHz,  $\text{CDCl}_3$ )  $\delta$  ppm 149.8, 146.5, 145.3, 134.4, 130.1, 127.6, 126.9, 122.4, 33.6, 23.1, 21.6; IR (KBr,  $\text{cm}^{-1}$ ) 3326, 1536, 545; HRMS (ESI) Calcd for  $\text{C}_{16}\text{H}_{18}\text{N}_2\text{O}_4\text{S}$ :  $\text{M}^+ = 334.0982$ ; found: 334.0976.

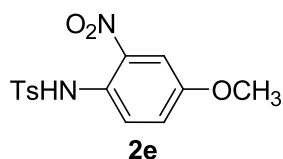

***N*-(4-methoxy-2-nitrophenyl)-4-methylbenzenesulfonamide (2e):** 63% yield; yellow solid; mp: 71–73 °C;  $^1\text{H}$  NMR (400 MHz,  $\text{CDCl}_3$ )  $\delta$  ppm 9.27 (s, 1H), 7.81-7.78 (m, 1H), 7.62-7.59 (m, 2H), 7.49-7.48 (d,  $J = 4.0$  Hz, 1H), 7.27-7.17 (m, 3H), 3.82 (s, 3H), 2.38 (s, 3H);  $^{13}\text{C}$  NMR (100 MHz,  $\text{CDCl}_3$ )  $\delta$  ppm 156.1, 144.6, 138.9, 135.4, 129.9, 127.1, 126.5, 124.7, 123.0, 109.0, 55.9, 21.5; IR (KBr,  $\text{cm}^{-1}$ ) 3299, 1167, 551; HRMS (ESI) Calcd for  $\text{C}_{14}\text{H}_{14}\text{N}_2\text{O}_5\text{S}$ :  $\text{M}^+\text{Na} = 345.0518$ ; Found: 345.0508.

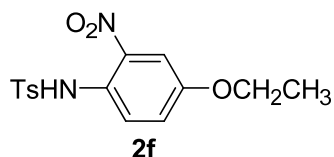

***N*-(4-ethoxy-2-nitrophenyl)-4-methylbenzenesulfonamide (2f):** 62% yield; yellow solid; mp: 91–93 °C;  $^1\text{H}$  NMR (400 MHz,  $\text{CDCl}_3$ )  $\delta$  ppm 9.27 (s, 1H), 7.81-7.78 (m, 1H), 7.62-7.59 (m, 2H), 7.49-7.48 (d,  $J = 4.0$  Hz, 1H), 7.23-7.17 (m, 3H), 3.82 (s, 3H), 2.38 (s, 3H);  $^{13}\text{C}$  NMR (100 MHz,  $\text{CDCl}_3$ )  $\delta$  ppm 155.5, 144.5, 139.0, 135.4, 129.9, 127.0, 126.2, 124.7, 123.3, 109.5, 64.4, 21.5, 14.5; IR (KBr,  $\text{cm}^{-1}$ ) 3299, 1166, 554; HRMS (ESI) Calcd for  $\text{C}_{15}\text{H}_{16}\text{N}_2\text{O}_5\text{S}$ :  $\text{M}^+\text{Na} = 359.0672$ ; found: 359.0665.

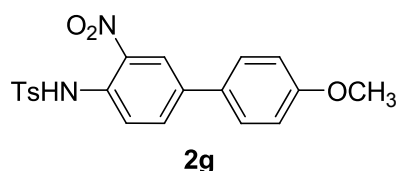

***N*-(4'-methoxy-3-nitrobiphenyl-4-yl)-4-methylbenzenesulfonamide (2g):** 62% yield; yellow oil;  $^1\text{H}$  NMR (400 MHz,  $\text{CDCl}_3$ )  $\delta$  ppm 9.40 (s, 1H), 7.79-7.76 (d,  $J = 8.8$  Hz, 1H), 7.66-7.64 (d,  $J = 8.4$  Hz, 2H), 7.52-7.51 (d,  $J = 3.2$  Hz, 1H), 7.25-7.20 (m, 3H), 6.95-6.88 (m, 4H), 3.80 (m, 3H), 2.38 (s, 3H);  $^{13}\text{C}$  NMR (100 MHz,  $\text{CDCl}_3$ )  $\delta$  ppm 156.7, 155.0, 148.1, 144.6, 138.4, 135.4, 129.9, 127.6, 124.0, 124.7, 123.9, 121.1, 115.1, 112.9, 55.5, 21.5; IR (KBr,  $\text{cm}^{-1}$ ) 3297, 1490, 549; HRMS (ESI) Calcd for  $\text{C}_{20}\text{H}_{18}\text{N}_2\text{O}_6\text{S}$ :  $\text{M}+\text{Na} = 437.0778$ ; fFound: 437.0768.

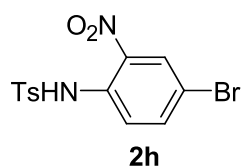

***N*-(4-bromo-2-nitrophenyl)-4-methylbenzenesulfonamide (2h):** 92% yield; yellow solid; mp: 99–101 °C;  $^1\text{H}$  NMR (400 MHz,  $\text{CDCl}_3$ )  $\delta$  ppm 9.77 (s, 1H), 8.24-8.23 (d,  $J = 2.4$  Hz, 1H), 7.77-7.66 (m, 4H), 7.29-7.27 (d,  $J = 8.4$  Hz, 2H), 2.40 (s, 3H);  $^{13}\text{C}$  NMR (100 MHz,  $\text{CDCl}_3$ )  $\delta$  ppm 145.1, 138.7, 137.1, 135.3, 133.0, 130.1, 128.6, 127.2, 122.2, 116.0, 21.6; IR (KBr,  $\text{cm}^{-1}$ ) 3299, 1170, 547; HRMS (ESI) Calcd for  $\text{C}_{13}\text{H}_{11}\text{BrN}_2\text{O}_4\text{S}$ :  $\text{M}+\text{Na} = 394.9495$ ; Found: 394.9506.

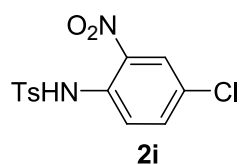

***N*-(4-chloro-2-nitrophenyl)-4-methylbenzenesulfonamide (2i):** 90% yield; yellow solid; mp: 110–112 °C;  $^1\text{H}$  NMR (400 MHz,  $\text{CDCl}_3$ )  $\delta$  ppm 9.76 (s, 1H), 8.11-8.10 (d,  $J = 2.4$  Hz, 1H), 7.85-7.83 (d,  $J = 5.2$  Hz, 1H), 7.75-7.73 (d,  $J = 2.4$  Hz, 2H), 7.75-7.73 (dd,  $J_1 = 2.4$  Hz,  $J_2 = 6.8$  Hz, 1H), 7.30-7.28 (d,  $J = 8.0$  Hz, 2H), 2.41 (s, 3H);  $^{13}\text{C}$  NMR (100 MHz,  $\text{CDCl}_3$ )  $\delta$  ppm 145.1, 137.0, 135.8, 135.3, 132.5, 130.1, 129.2, 127.2, 125.7, 122.2, 21.6; IR (KBr,  $\text{cm}^{-1}$ ) 3299, 1170, 547; HRMS (ESI) Calcd for  $\text{C}_{13}\text{H}_{11}\text{ClN}_2\text{O}_4\text{S}$ :  $\text{M}+\text{Na} = 349.0020$ ; found: 349.0010.

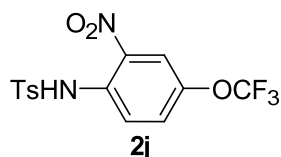

**4-Methyl-N-(2-nitro-4-(trifluoromethoxy)phenyl)benzenesulfonamide (2j):** 90% yield; yellow oil,  $^1\text{H}$  NMR (400 MHz,  $\text{CDCl}_3$ )  $\delta$  ppm 9.86 (s, 1H), 8.02 (s, 1H), 7.94-7.92 (d,  $J = 9.2$  Hz, 1H), 7.78-7.76 (d,  $J = 8.0$  Hz, 2H), 7.50-7.48 (d,  $J = 9.2$  Hz, 1H), 7.33-7.31 (d,  $J = 7.6$  Hz, 2H), 2.42 (s, 3H);  $^{13}\text{C}$  NMR (100 MHz,  $\text{CDCl}_3$ )  $\delta$  ppm 145.2, 143.7, 136.5, 135.3, 132.7, 130.1, 128.7, 127.2, 124.0, 122.1, 121.4, 118.8, 118.7, 21.5, 21.6; IR (neat,  $\text{cm}^{-1}$ ) 3297, 2925, 1265, 741; HRMS (ESI) Calcd for  $\text{C}_{14}\text{H}_{11}\text{F}_3\text{N}_2\text{O}_5\text{S}$ :  $\text{M}+\text{Na} = 399.0233$ ; found: 399.0223.

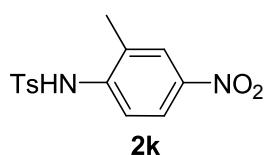

**4-Methyl-N-(2-methyl-4-nitrophenyl)benzenesulfonamide (2k):** 83% yield; yellow solid; mp: 158–160 °C;  $^1\text{H}$ NMR (400 MHz,  $\text{CDCl}_3$ )  $\delta$  ppm 8.46-8.45 (d,  $J = 0.8$  Hz, 2H), 8.00 (s, 1H), 7.43-7.41 (d,  $J = 8.4$  Hz, 2H), 7.27-7.25 (d,  $J = 8.8$  Hz, 2H), 2.79 (s, 3H), 2.46 (s, 3H);  $^{13}\text{C}$  NMR (100 MHz,  $\text{CDCl}_3$ )  $\delta$  ppm 145.6, 145.5, 145.0, 144.2, 134.5, 134.0, 130.6, 130.3, 127.2, 118.1, 21.7, 20.4; IR (KBr,  $\text{cm}^{-1}$ ) 3295, 1543, 1345, 1167; HRMS (ESI) Calcd for  $\text{C}_{14}\text{H}_{14}\text{N}_2\text{O}_4\text{S}$ :  $\text{M}+\text{Na} = 329.0566$ ; 329.0576.

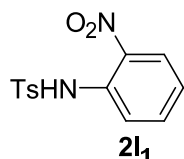

**4-Methyl-N-(2-nitrophenyl)benzenesulfonamide (2k<sub>1</sub>):** 31% yield; yellow solid; mp: 113–115 °C;  $^1\text{H}$  NMR (400 MHz,  $\text{CDCl}_3$ )  $\delta$  ppm 9.87 (s, 1H), 8.12-8.10 (dd,  $J_1 = 1.2$  Hz,  $J_2 = 7.2$  Hz, 1H), 7.85-7.82 (d,  $J = 8.8$  Hz, 1H), 7.75-7.73 (d,  $J = 8.4$  Hz, 2H), 7.61-7.56 (m, 1H), 7.27-7.25 (d,  $J = 8.0$  Hz, 2H), 7.17-7.13 (m, 1H), 2.37 (s, 3H);  $^{13}\text{C}$  NMR (100 MHz,  $\text{CDCl}_3$ )  $\delta$  ppm 145.0, 142.6, 130.1, 127.3, 125.4, 118.6, 21.6; IR (KBr,  $\text{cm}^{-1}$ ) 3288, 1186, 546; HRMS (ESI) Calcd for  $\text{C}_{13}\text{H}_{12}\text{N}_2\text{O}_4$ :  $\text{M}+\text{Na} = 315.0410$ ; found: 315.0404.

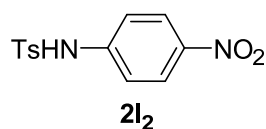

**4-Methyl-*N*-(4-nitrophenyl)benzenesulfonamide (2k<sub>2</sub>):** 62% yield; yellow solid; mp: 113–115 °C; <sup>1</sup>H NMR (400 MHz, CDCl<sub>3</sub>) δ ppm 8.14-8.12 (d, *J* = 8.8 Hz, 2H), 7.78-7.76 (d, *J* = 8.4 Hz, 2H), 7.31-7.29 (d, *J* = 4.0 Hz, 2H), 7.23-7.19 (m, 3H), 2.40 (s, 3H); <sup>13</sup>C NMR (100 MHz, CDCl<sub>3</sub>) δ ppm 135.5, 132.3, 131.1, 130.3, 125.9, 124.4 (q, *J* = 276.0 Hz, CF<sub>3</sub>), 123.4, 117.9, 39.5 (q, *J* = 30.0 Hz, CH<sub>2</sub>CF<sub>3</sub>), 30.8 (q, *J* = 3.0 Hz, CHCN); <sup>19</sup>F NMR (376 MHz, CDCl<sub>3</sub>): δ -64.97 (s, 3F); IR (KBr, cm<sup>-1</sup>) 3330, 2924, 1159; HRMS (ESI) Calcd for C<sub>13</sub>H<sub>12</sub>N<sub>2</sub>O<sub>4</sub>S: M+Na = 315.0410; found: 315.0421.

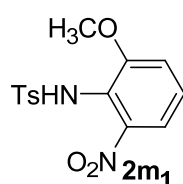

***N*-(2-methoxy-6-nitrophenyl)-4-methylbenzenesulfonamide (2m<sub>1</sub>):** 50% yield; yellow solid; mp: 138–140 °C; <sup>1</sup>H NMR (400 MHz, CDCl<sub>3</sub>) δ ppm 7.84-7.81 (m, 1H), 7.78-7.76 (d, *J* = 8.4 Hz, 2H), 7.65-7.64 (d, *J* = 2.4 Hz, 1H), 7.61-7.59 (d, *J* = 8.8 Hz, 1H), 7.51 (s, 1H), 7.28-7.26 (d, *J* = 8.0 Hz, 2H), 3.90 (s, 3H), 2.39 (s, 3H); <sup>13</sup>C NMR (100 MHz, CDCl<sub>3</sub>) δ ppm 147.7, 144.7, 143.6, 135.6, 132.6, 129.9, 127.2, 117.4, 116.7, 105.8, 56.4, 21.6; IR (KBr, cm<sup>-1</sup>) 3286, 2923, 741; HRMS (ESI) Calcd for C<sub>14</sub>H<sub>14</sub>N<sub>2</sub>O<sub>5</sub>S: M+Na = 345.0516; found: 345.0508.

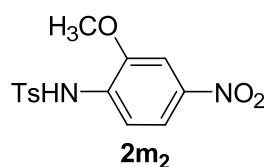

***N*-(2-methoxy-4-nitrophenyl)-4-methylbenzenesulfonamide (2m<sub>2</sub>):** 32% yield; yellow solid; mp: 157–159 °C; <sup>1</sup>H NMR (400 MHz, CDCl<sub>3</sub>) δ ppm 8.74 (s, 1H), 8.56-8.55 (d, *J* = 4.0 Hz, 1H), 7.90-7.89 (d, *J* = 4.0 Hz, 1H), 7.77-7.75 (d, *J* = 8.0 Hz, 2H), 7.36-7.34 (d, *J* = 8.0 Hz, 2H), 3.70 (s, 3H), 2.47 (s, 3H); <sup>13</sup>C NMR (100 MHz, CDCl<sub>3</sub>) δ ppm 161.6, 135.5, 124.6 (q, *J* = 276.0 Hz, CF<sub>3</sub>), 118.4, 105.3, 100.4, 55.4, 39.5 (q, *J* = 30.0 Hz, CH<sub>2</sub>CF<sub>3</sub>), 31.3 (q, *J* = 3.0 Hz, CHCN); <sup>19</sup>F NMR (376 MHz, CDCl<sub>3</sub>): δ -65.18 (s, 3F); IR (KBr, cm<sup>-1</sup>) 3285, 2924, 1546, 1345; HRMS (ESI) Calcd



for C<sub>14</sub>H<sub>14</sub>N<sub>2</sub>O<sub>5</sub>S: M+Na = 345.0516; found: 345.0507.

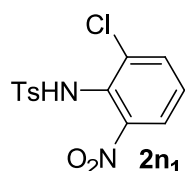

***N*-(2-chloro-6-nitrophenyl)-4-methylbenzenesulfonamide (2n<sub>1</sub>):** 82% yield; yellow solid; mp: 163–165 °C; <sup>1</sup>H NMR (400 MHz, CDCl<sub>3</sub>) δ ppm 8.21-8.20 (d, *J* = 8.8 Hz, 1H), 8.20-8.08 (m, 1H), 7.78-7.76 (m, 3H), 7.56-7.49 (m, 1H), 7.31-7.29 (d, *J* = 8.0 Hz, 2H), 2.41 (s, 3H); <sup>13</sup>C NMR (100 MHz, CDCl<sub>3</sub>) δ ppm 145.3, 143.5, 139.5, 135.2, 130.1, 127.3, 125.2, 123.5, 123.2, 118.7, 21.6; IR (KBr, cm<sup>-1</sup>) 3295, 2926, 742, 547; HRMS (ESI) Calcd for C<sub>13</sub>H<sub>11</sub>ClN<sub>2</sub>O<sub>4</sub>S: M+Na = 349.0020; found: 349.0011.

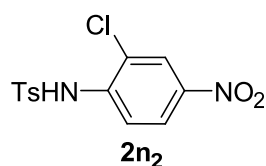

***N*-(2-chloro-4-nitrophenyl)-4-methylbenzenesulfonamide (2n<sub>2</sub>):** 17% yield; yellow solid; mp: 116–118 °C; <sup>1</sup>H NMR (400 MHz, CDCl<sub>3</sub>) δ ppm 7.78-7.76 (d, *J* = 8.0 Hz, 1H), 7.72-7.70 (d, *J* = 8.0 Hz, 1H), 7.55-7.53 (d, *J* = 8.0 Hz, 2H), 7.39-7.35 (m, 1H), 7.26-7.24 (d, *J* = 8.0 Hz, 2H), 2.44 (s, 3H); <sup>13</sup>C NMR (100 MHz, CDCl<sub>3</sub>) δ ppm 147.4, 144.9, 135.8, 135.4, 135.3, 129.9, 128.1, 128.0, 127.3, 123.8, 21.6; IR (KBr, cm<sup>-1</sup>) 3267, 2925, 571; HRMS (ESI) Calcd for C<sub>13</sub>H<sub>11</sub>ClN<sub>2</sub>O<sub>4</sub>S: M+Na = 349.0020; found: 349.0033.

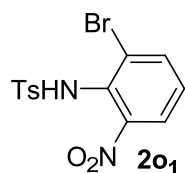

***N*-(2-bromo-6-nitrophenyl)-4-methylbenzenesulfonamide (2o<sub>1</sub>):** 76% yield; yellow solid; mp: 134–136 °C; <sup>1</sup>H NMR (400 MHz, CDCl<sub>3</sub>) δ ppm 8.35-8.34 (d, *J* = 2.4 Hz, 1H), 8.14-8.11 (m, 1H), 7.79-7.75 (m, 3H), 7.53 (s, 1H), 7.31-7.29 (d, *J* = 8.4 Hz, 2H), 2.40 (s, 3H); <sup>13</sup>C NMR (100 MHz, CDCl<sub>3</sub>) δ ppm 145.2, 143.6, 140.6, 135.1, 130.0, 128.3, 127.3, 124.0, 118.8, 113.1, 21.6; IR (KBr, cm<sup>-1</sup>) 3284, 1167, 663; HRMS (ESI) Calcd for C<sub>13</sub>H<sub>11</sub>BrN<sub>2</sub>O<sub>4</sub>S: M+Na = 392.9515; found: 392.9510.

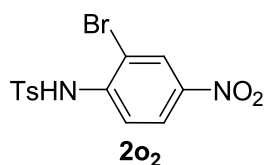

***N*-(2-bromo-4-nitrophenyl)-4-methylbenzenesulfonamide (2o<sub>2</sub>):** 21% yield; yellow solid; mp: 136–138 °C; <sup>1</sup>H NMR (400 MHz, CDCl<sub>3</sub>) δ ppm 7.89-7.87 (d, *J* = 8.0 Hz, 1H), 7.81-7.79 (dd, *J*<sub>1</sub> = 0.8 Hz, *J*<sub>2</sub> = 8.0 Hz, 1H), 7.53-7.51 (d, *J* = 8.0 Hz, 2H), 7.33-7.24 (m, 3H); <sup>13</sup>C NMR (100 MHz, CDCl<sub>3</sub>) δ ppm 147.6, 144.9, 138.3, 135.3, 130.0, 129.0, 128.6, 127.4, 126.0, 124.5, 21.7; IR (KBr, cm<sup>-1</sup>) 3269, 1168, 570; HRMS (ESI) Calcd for C<sub>13</sub>H<sub>11</sub>BrN<sub>2</sub>O<sub>4</sub>S: M+Na = 392.9515; found: 392.9506.

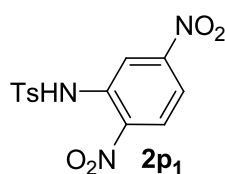

***N*-(2,5-dinitrophenyl)-4-methylbenzenesulfonamide (2p<sub>1</sub>):** 44% yield; yellow oil; <sup>1</sup>H NMR (400 MHz, CDCl<sub>3</sub>) δ ppm 9.97 (s, 1H) 8.70-8.69 (d, *J* = 2.0 Hz, 1H), 8.35-8.32 (d, *J* = 9.2 Hz, 1H), 7.93-7.90 (m, 1H), 7.87-7.85 (d, *J* = 8.4 Hz, 2H), 7.36-7.34 (d, *J* = 8.0 Hz, 2H), 2.42 (s, 3H); <sup>13</sup>C NMR (100 MHz, CDCl<sub>3</sub>) δ ppm 151.1, 145.7, 138.5, 135.2, 134.9, 130.4, 127.8, 127.5, 117.1, 115.1, 21.7; IR (KBr, cm<sup>-1</sup>) 3422, 1027; HRMS (ESI) Calcd for C<sub>13</sub>H<sub>11</sub>N<sub>3</sub>O<sub>6</sub>S: M+Na = 360.0261; found: 360.0253.

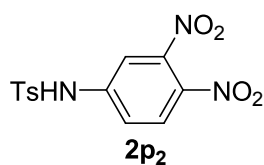

***N*-(3,4-dinitrophenyl)-4-methylbenzenesulfonamide (2p<sub>2</sub>):** 32% yield; yellow solid; mp: 125–127 °C; <sup>1</sup>H NMR (400 MHz, DMSO) δ ppm 11.70 (s, 1H) 8.17-8.14 (d, *J* = 2.4 Hz, 1H), 7.82-7.80 (d, *J* = 8.0 Hz, 2H), 7.68-7.67 (d, *J* = 2.4 Hz, 1H), 7.52-7.43 (s, 2H), 2.36 (s, 3H); <sup>13</sup>C NMR (100 MHz, DMSO) δ ppm 145.1, 144.5, 144.3, 136.1, 135.9, 130.7, 128.5, 127.4, 120.9, 113.7, 21.5; IR (KBr, cm<sup>-1</sup>) 3293, 1167, 735; HRMS (ESI) Calcd for C<sub>13</sub>H<sub>11</sub>N<sub>3</sub>O<sub>6</sub>S: M+Na = 360.0261; found: 360.0253.

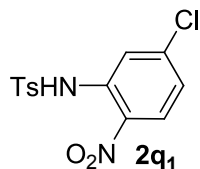

***N*-(5-chloro-2-nitrophenyl)-4-methylbenzenesulfonamide (2q<sub>1</sub>):** 35% yield; yellow solid; mp: 166–168 °C; <sup>1</sup>H NMR (400 MHz, CDCl<sub>3</sub>) δ ppm 10.28 (s, 1H), 8.88 (s, 1H), 8.05 (s, 1H), 7.87-7.84 (d, *J* = 8.4 Hz, 1H), 7.39-7.37 (d, *J* = 8.4 Hz, 1H), 2.45 (s, 3H); <sup>13</sup>C NMR (100 MHz, CDCl<sub>3</sub>) δ ppm 146.2, 140.8, 137.7, 135.7, 134.6, 132.7, 130.5, 127.5, 124.9, 121.5, 21.7; IR (KBr, cm<sup>-1</sup>) 3238, 1164, 543; HRMS (ESI) Calcd for C<sub>13</sub>H<sub>11</sub>ClN<sub>2</sub>O<sub>4</sub>S: M+Na = 349.0020; found: 349.0014.

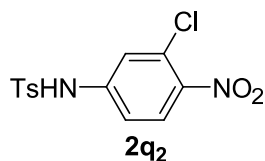

***N*-(3-chloro-4-nitrophenyl)-4-methylbenzenesulfonamide (2q<sub>2</sub>):** 24% yield; yellow solid; mp: 166–168 °C; <sup>1</sup>H NMR (400 MHz, CDCl<sub>3</sub>) δ ppm 10.00 (s, 1H), 8.10-8.07 (d, *J* = 8.8 Hz, 1H), 7.87-7.86 (d, *J* = 2.4 Hz, 1H), 7.79-7.77 (d, *J* = 8.4 Hz, 2H), 7.32-7.30 (d, *J* = 8.0 Hz, 2H), 7.11-7.08 (m, 1H), 2.41 (s, 3H); <sup>13</sup>C NMR (100 MHz, CDCl<sub>3</sub>) δ ppm 145.2, 142.6, 135.3, 135.1, 134.7, 130.1, 127.4, 127.3, 123.8, 120.0, 21.6; IR (KBr, cm<sup>-1</sup>) 3238, 1164, 543; HRMS (ESI) Calcd for C<sub>13</sub>H<sub>11</sub>ClN<sub>2</sub>O<sub>4</sub>S: M+Na = 349.0021; found: 349.0031.

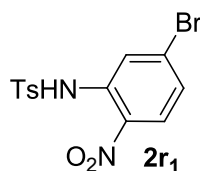

***N*-(5-bromo-2-nitrophenyl)-4-methylbenzenesulfonamide (2r<sub>1</sub>):** 43% yield; yellow solid; mp: 147–149 °C; <sup>1</sup>H NMR (400 MHz, CDCl<sub>3</sub>) δ ppm 10.06 (s, 1H), 8.81 (s, 1H), 8.26 (s, 1H), 7.86-7.84 (d, *J* = 8.4 Hz, 2H), 7.39-7.37 (d, *J* = 8.4 Hz, 1H), 2.45 (s, 3H); <sup>13</sup>C NMR (100 MHz, CDCl<sub>3</sub>) δ ppm 146.2, 142.8, 137.3, 134.7, 133.3, 130.5, 127.5, 125.0, 124.5, 123.6, 21.7; IR (KBr, cm<sup>-1</sup>) 3237, 2923, 1165; HRMS (ESI) Calcd for C<sub>13</sub>H<sub>11</sub>BrN<sub>2</sub>O<sub>4</sub>S: M+Na = 392.9515; found: 392.9507.

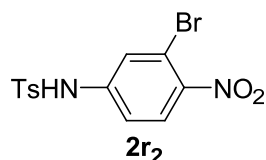

***N*-(3-bromo-4-nitrophenyl)-4-methylbenzenesulfonamide (2r<sub>2</sub>):** 20% yield; yellow solid; mp: 126–128 °C; <sup>1</sup>H NMR (400 MHz, CDCl<sub>3</sub>) δ ppm 9.96 (s, 1H) 8.04-7.98 (m, 2H), 7.78-7.76 (d, *J* = 8.4 Hz, 2H), 7.32-7.30 (d, *J* = 2.0 Hz, 2H), 7.27-7.24 (dd, *J*<sub>1</sub> = 2.0 Hz, *J*<sub>2</sub> = 7.2 Hz, 1H), 2.41 (s, 3H); <sup>13</sup>C NMR (100 MHz, CDCl<sub>3</sub>) δ ppm 145.2, 135.3, 135.0, 131.2, 130.1, 127.3, 126.8, 123.1, 21.6; IR (KBr, cm<sup>-1</sup>) 3252, 2925, 743; HRMS (ESI) Calcd for C<sub>13</sub>H<sub>11</sub>BrN<sub>2</sub>O<sub>4</sub>S: M+Na = 394.9495; found: 394.9505.

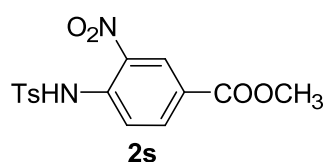

**Methyl 4-(4-methylphenylsulfonamido)-3-nitrobenzoate (2s):** 83% yield; yellow solid; mp: 139–141 °C; <sup>1</sup>H NMR (400 MHz, CDCl<sub>3</sub>) δ ppm 10.20 (s, 1H), 8.81-8.80 (d, *J* = 4.0 Hz, 1H), 8.19-8.17 (m, 1H), 7.89-7.87 (d, *J* = 8.0 Hz, 1H), 7.82-7.79 (d, *J* = 12.0 Hz, 2H), 7.31-7.27 (m, 2H), 3.92 (s, 3H), 2.40 (s, 3H); <sup>13</sup>C NMR (100 MHz, CDCl<sub>3</sub>) δ ppm 164.4, 145.3, 137.6, 136.3, 135.6, 135.3, 130.1, 128.0, 127.4, 125.1, 119.3, 52.6, 21.6; HRMS (ESI) Calcd for C<sub>15</sub>H<sub>14</sub>F<sub>3</sub>N<sub>2</sub>O<sub>6</sub>S: M+Na = 373.0465; found: 373.0469.

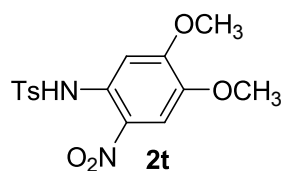

***N*-(4,5-dimethoxy-2-nitrophenyl)-4-methylbenzenesulfonamide (2t):** 32% yield; yellow solid; mp: 192–194 °C; <sup>1</sup>H NMR (400 MHz, CDCl<sub>3</sub>) δ ppm 10.10 (s, 1H) 7.70-7.68 (d, *J* = 8.0 Hz, 2H), 7.54 (s, 1H), 7.35 (s, 1H), 7.27-7.24 (m, 2H), 3.98 (s, 3H), 3.87 (s, 3H), 2.39 (s, 3H); <sup>13</sup>C NMR (100MHz, CDCl<sub>3</sub>) δ ppm 155.4, 145.2, 144.8, 135.5, 130.2, 130.0, 127.1, 107.2, 103.0, 56.7, 56.3, 21.6; IR (KBr, cm<sup>-1</sup>) 3231, 2922, 1248, 1160; HRMS (ESI) Calcd for C<sub>15</sub>H<sub>16</sub>N<sub>2</sub>O<sub>6</sub>S: M+Na = 375.0621; found: 375.0616.

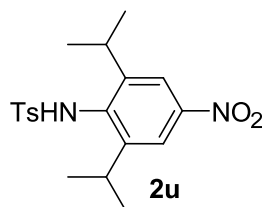

***N*-(2,6-diisopropyl-4-nitrophenyl)-4-methylbenzenesulfonamide (2u):** 43% yield; yellow solid; mp: 172–174 °C;  $^1\text{H}$  NMR (400 MHz,  $\text{CDCl}_3$ )  $\delta$  ppm 8.00-7.98 (m, 2H) 7.60-7.58 (m, 2H), 7.30-7.27 (m, 2H), 6.32 (s, 1H), 3.22-3.17 (m, 2H), 2.44 (s, 3H), 1.07-1.05 (m, 12H);  $^{13}\text{C}$  NMR (100MHz,  $\text{CDCl}_3$ )  $\delta$  ppm 150.2, 147.8, 145.2, 144.4, 136.6, 135.2, 129.8, 127.3, 119.3, 29.0, 23.5, 21.5; IR (KBr,  $\text{cm}^{-1}$ ) 3250, 2968, 1161, 739; HRMS (ESI) Calcd for  $\text{C}_{19}\text{H}_{24}\text{N}_2\text{O}_4\text{S}$ :  $\text{M}+\text{Na} = 399.0233$ ; found: 399.0225.

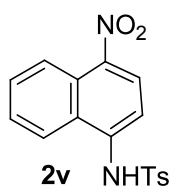

**4-Methyl-*N*-(4-nitronaphthalen-1-yl)benzenesulfonamide (2v):** 76% yield; yellow solid; mp: 159–161 °C;  $^1\text{H}$  NMR (400 MHz,  $\text{CDCl}_3$ )  $\delta$  ppm 8.97-8.95 (d,  $J = 8.8$  Hz, 1H), 8.83 (s, 1H), 8.58-8.55 (d,  $J = 11.2$  Hz, 2H), 8.01-7.97 (m, 1H), 7.91-7.87 (m, 1H), 7.35-7.32 (d,  $J = 8.4$  Hz, 2H), 7.23-7.21 (d,  $J = 8.4$  Hz, 2H), 2.44 (s, 3H);  $^{13}\text{C}$  NMR (100 MHz,  $\text{CDCl}_3$ )  $\delta$  ppm 145.6, 144.7, 138.8, 134.6, 133.6, 133.5, 132.4, 130.2, 129.9, 129.1, 127.6, 127.2, 122.7, 118.1, 21.7; IR (KBr,  $\text{cm}^{-1}$ ) 3281, 2925, 1168, 544; HRMS (ESI) Calcd for  $\text{C}_{17}\text{H}_{14}\text{N}_2\text{O}_4\text{S}$ :  $\text{M}+\text{Na} = 365.0566$ ; found: 365.0562.

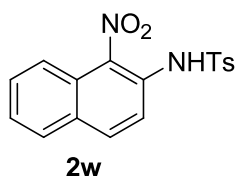

**4-Methyl-*N*-(1-nitronaphthalen-2-yl)benzenesulfonamide (2w):** 85% yield; yellow solid; mp: 159–161 °C;  $^1\text{H}$  NMR (400 MHz,  $\text{CDCl}_3$ )  $\delta$  ppm 8.48 (s, 1H), 8.00-7.91 (m, 3H), 7.85-7.83 (d,  $J = 8.4$  Hz, 1H), 7.64-7.53 (m, 4H), 7.22-7.20 (d,  $J = 8.4$  Hz, 2H), 2.35 (s, 3H);  $^{13}\text{C}$  NMR (100 MHz,  $\text{CDCl}_3$ )  $\delta$  ppm 144.8, 137.6, 135.5, 134.1, 131.0, 130.0, 129.9, 129.7, 128.3, 127.0, 126.9, 125.5, 122.3, 120.7, 21.6; HRMS

(ESI) Calcd for  $C_{17}H_{14}N_2O_4S$ :  $M+Na = 365.0566$ ; found: 365.0565.

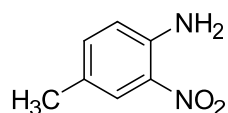

**4-Methyl-2-nitroaniline:** 86% yield; yellow solid; mp: 107–109 °C;  $^1H$  NMR (400 MHz,  $CDCl_3$ )  $\delta$  ppm 7.90 (s, 1H), 7.20-7.18 (dd,  $J_1 = 2.0$  Hz,  $J_2 = 6.4$  Hz, 1H), 6.75-6.73 (d,  $J = 8.4$  Hz, 1H), 5.94 (s, 2H), 2.62 (s, 3H);  $^{13}C$  NMR (100 MHz,  $CDCl_3$ )  $\delta$  ppm 142.7, 137.2, 131.8, 126.5, 125.2, 118.7, 20.0; IR (KBr,  $cm^{-1}$ ) 3340.8, 2923.1, 2367, 1243, 1165; HRMS (ESI) Calcd for  $C_7H_8N_2O_2$ :  $M+Na = 153.0659$ ; found: 153.0662.

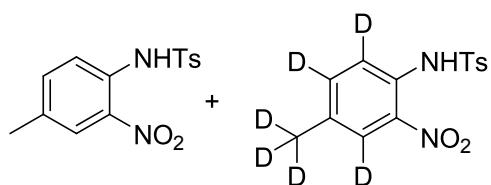

$^1H$  NMR (400 MHz,  $CDCl_3$ )  $\delta$  ppm 9.66 (s, 2H), 7.88 (s, 1H), 7.74-7.68 (m, 5H), 7.41-7.39 (d,  $J = 8.8$  Hz, 1H), 7.28-7.23 (m, 4H), 2.38, (s, 6H), 2.34, (s, 3H);  $^{13}C$  NMR (100 MHz,  $CDCl_3$ )  $\delta$  ppm 144.6, 137.1, 137.0, 136.7, 135.5, 134.4, 134.1, 131.1, 130.1, 130.0, 129.8, 127.1, 126.9, 125.8, 125.8, 121.3, 21.5, 20.4.

## 5. Crystallographic data of 2a

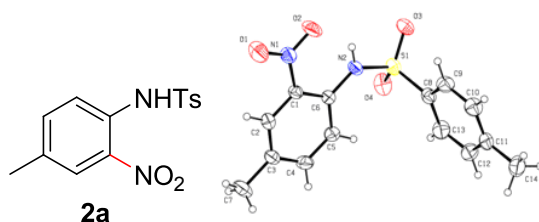

### checkCIF/PLATON report

You have not supplied any structure factors. As a result the full set of tests cannot be run.

THIS REPORT IS FOR GUIDANCE ONLY. IF USED AS PART OF A REVIEW PROCEDURE FOR PUBLICATION, IT SHOULD NOT REPLACE THE EXPERTISE OF AN EXPERIENCED CRYSTALLOGRAPHIC REFEREE.

No syntax errors found. [CIF dictionary](#) [Interpreting this report](#)

### Datablock: liyx1129

---

Bond precision: C-C = 0.0038 Å      Wavelength=0.71070

Cell:            a=7.277 (2)            b=9.1288 (18)            c=11.6854 (14)  
                  alpha=92.665 (13)            beta=97.218 (15)            gamma=107.79 (2)

Temperature: 293 K

|                        | Calculated      | Reported        |
|------------------------|-----------------|-----------------|
| Volume                 | 730.3 (3)       | 730.3 (3)       |
| Space group            | P -1            | P -1            |
| Hall group             | -P 1            | -P 1            |
| Moiety formula         | C14 H14 N2 O4 S | C14 H14 N2 O4 S |
| Sum formula            | C14 H14 N2 O4 S | C14 H14 N2 O4 S |
| Mr                     | 306.34          | 306.33          |
| Dx, g cm <sup>-3</sup> | 1.393           | 1.393           |
| Z                      | 2               | 2               |
| Mu (mm <sup>-1</sup> ) | 0.239           | 0.239           |
| F000                   | 320.0           | 320.0           |
| F000'                  | 320.40          |                 |
| h, k, lmax             | 8, 11, 14       | 8, 11, 14       |
| Nref                   | 2870            | 2864            |
| Tmin, Tmax             | 0.911, 0.920    | 0.635, 1.000    |
| Tmin'                  | 0.911           |                 |

Correction method= MULTI-SCAN

Data completeness= 0.998      Theta(max)= 26.010

R(reflections)= 0.0517 ( 2076)      wR2(reflections)= 0.1545 ( 2864)

S = 1.084      Npar= Npar = 203

---

The following ALERTS were generated. Each ALERT has the format  
test-name ALERT alert-type alert-level.  
Click on the hyperlinks for more details of the test.

---

## 6. $^1\text{H}$ NMR, $^{13}\text{C}$ NMR, Spectra for Substrates 2a-3v

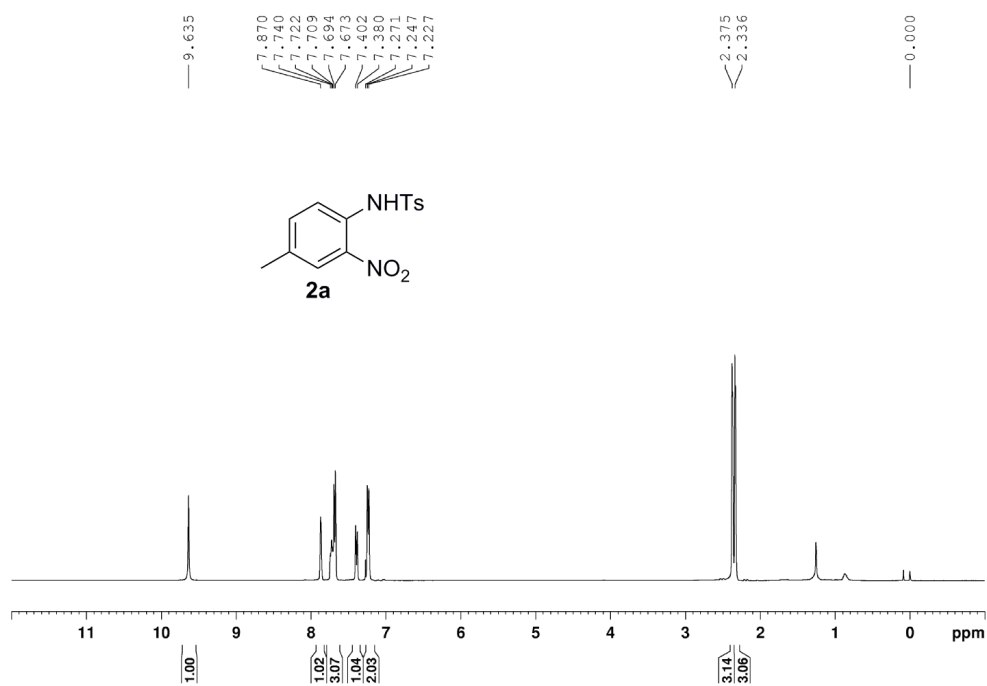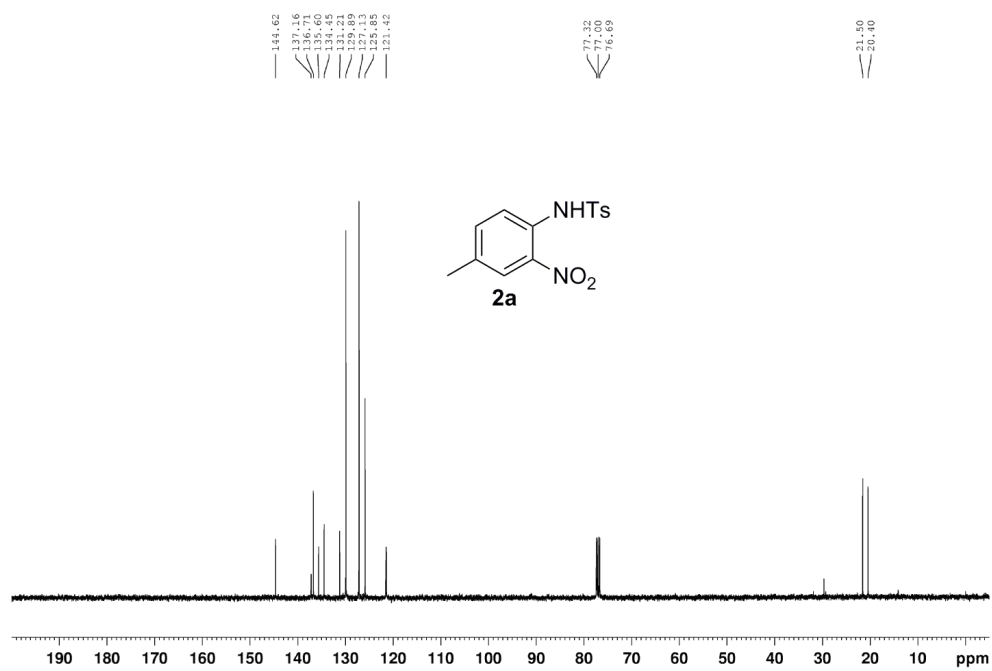



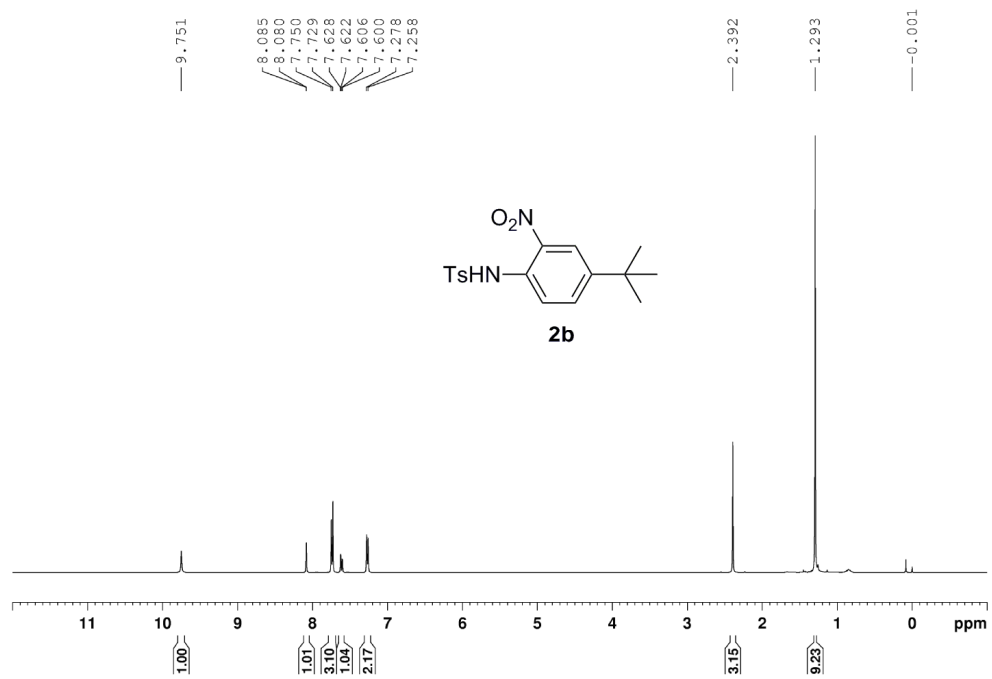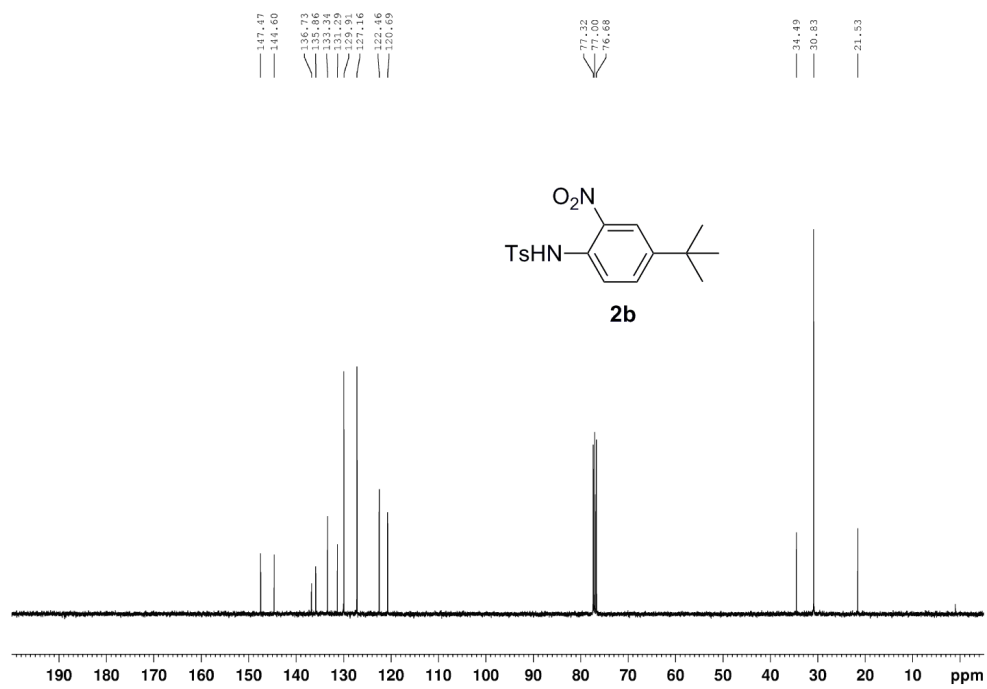

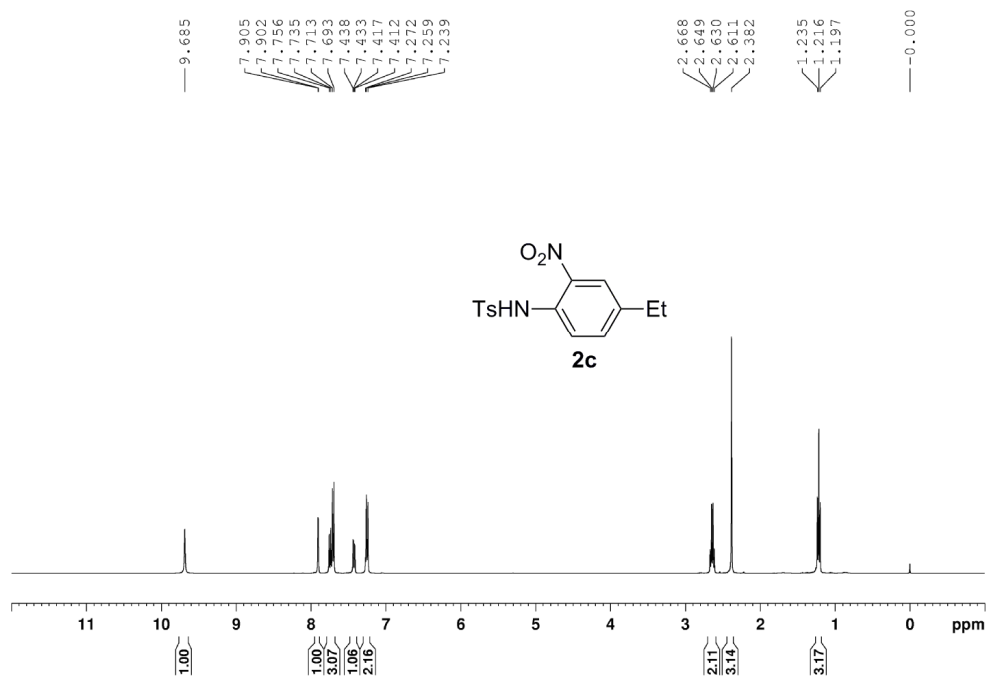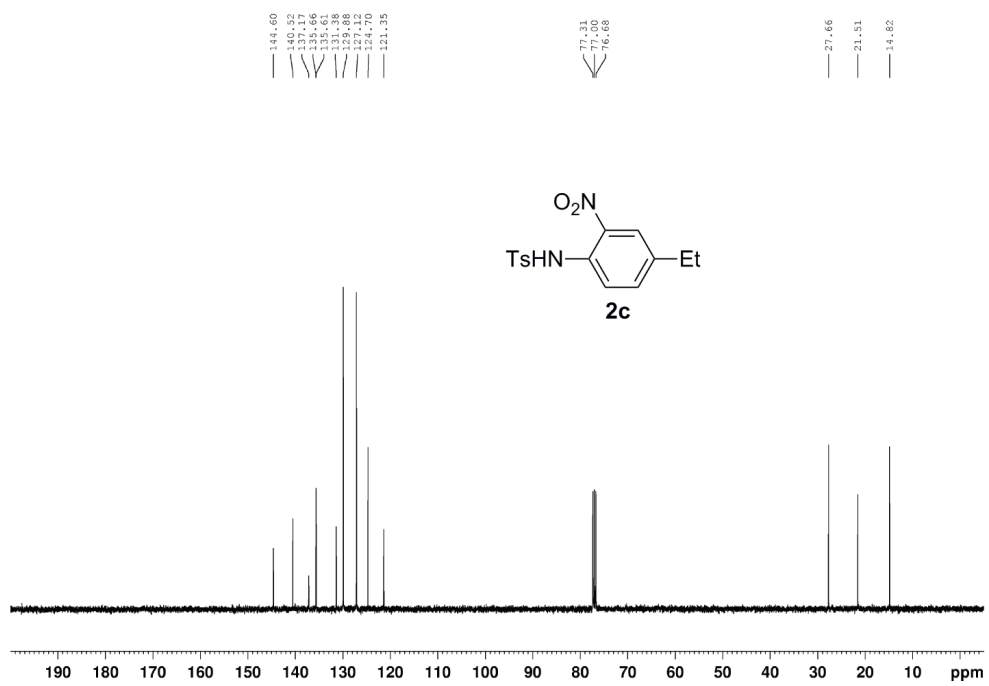

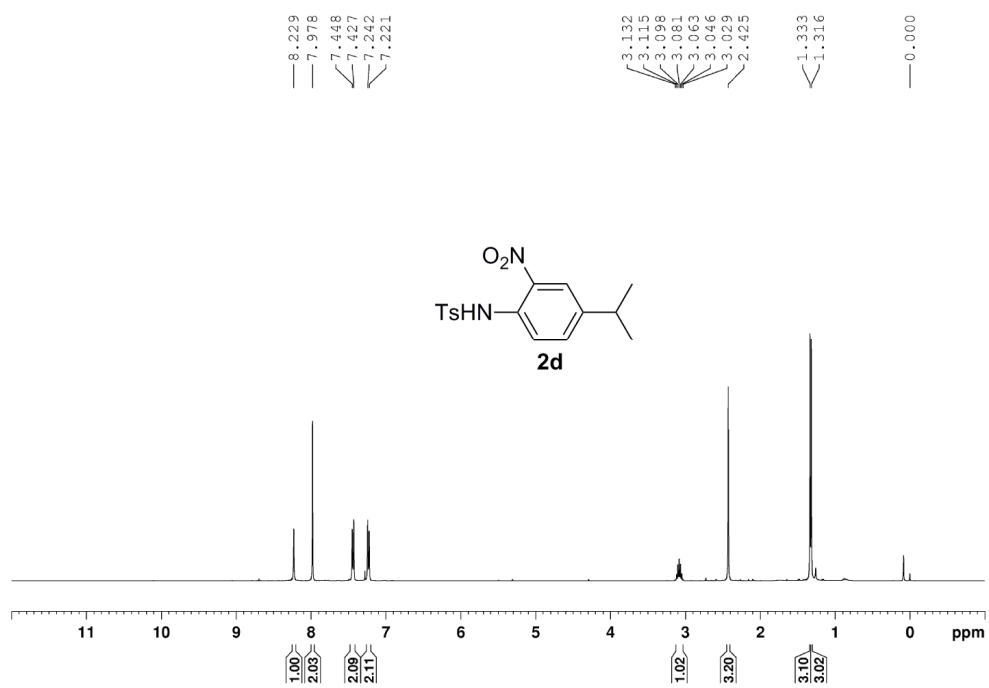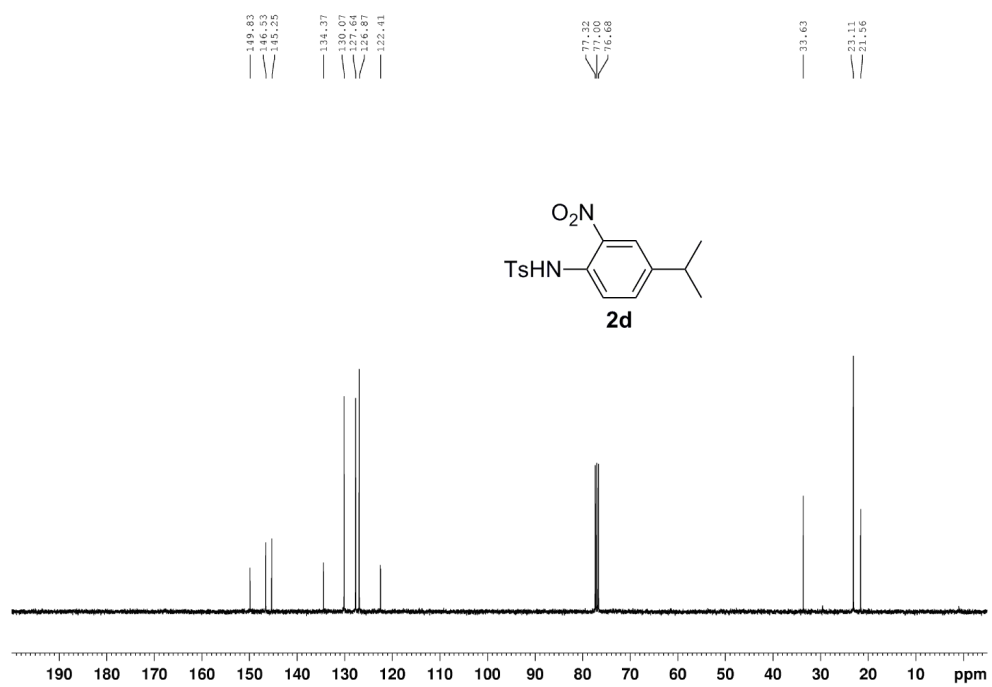

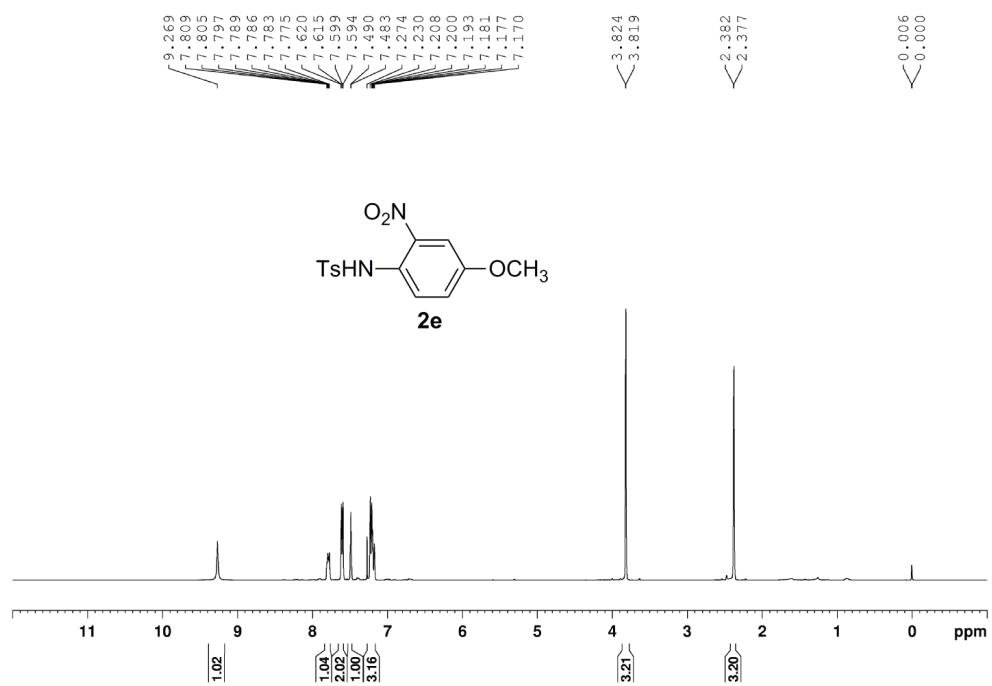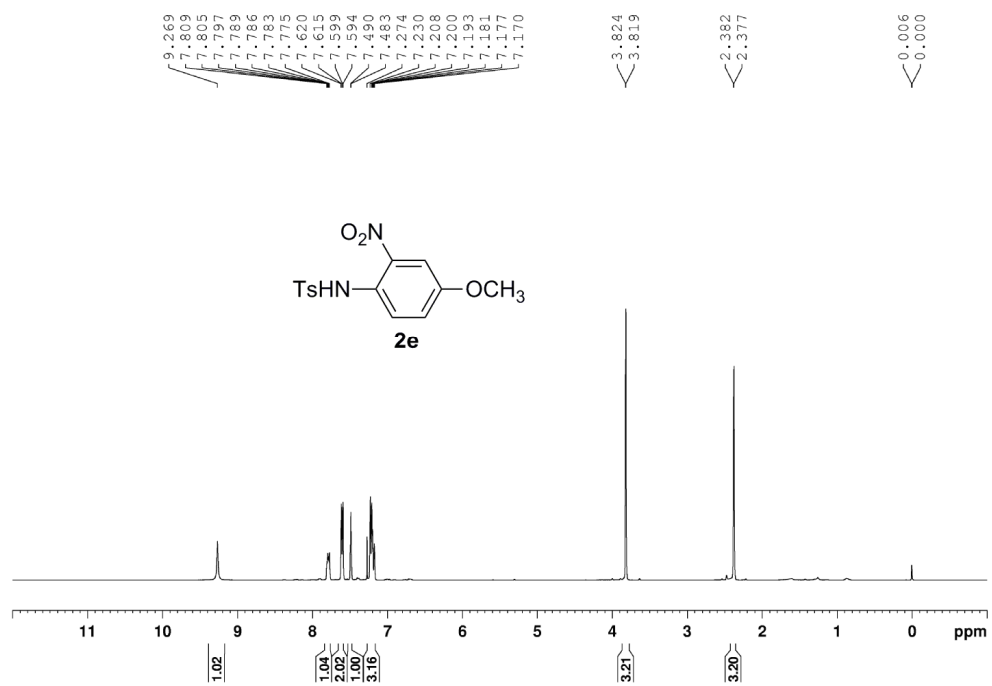

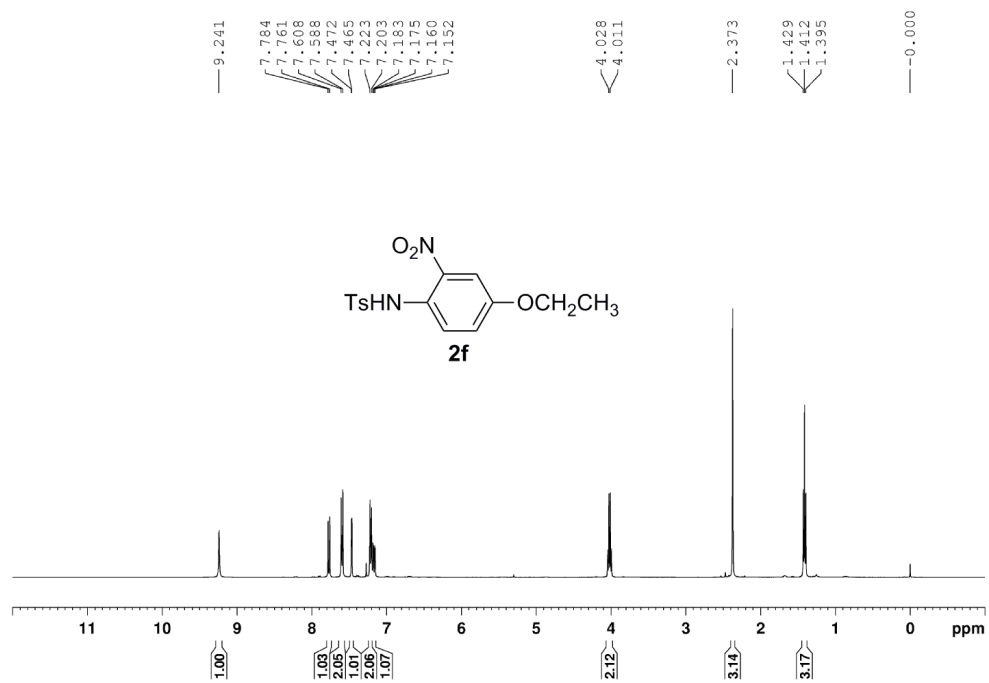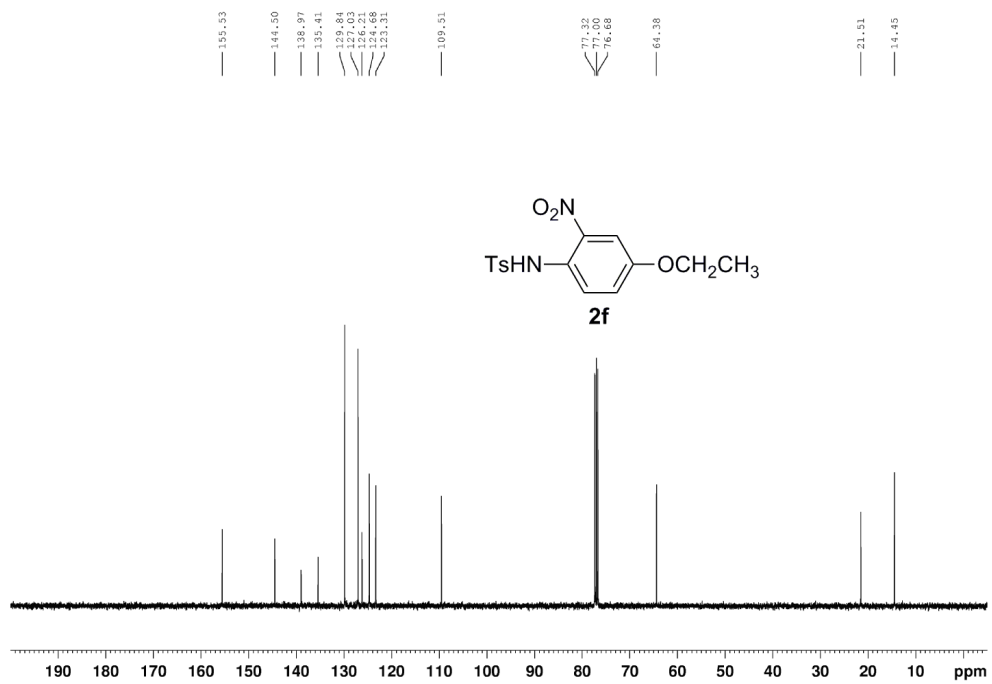

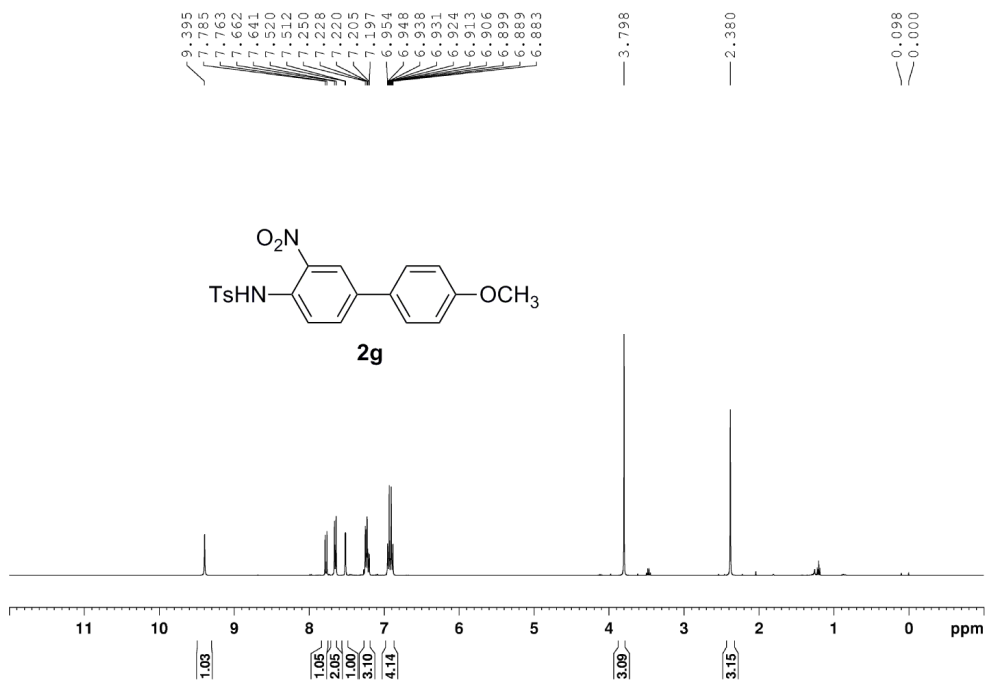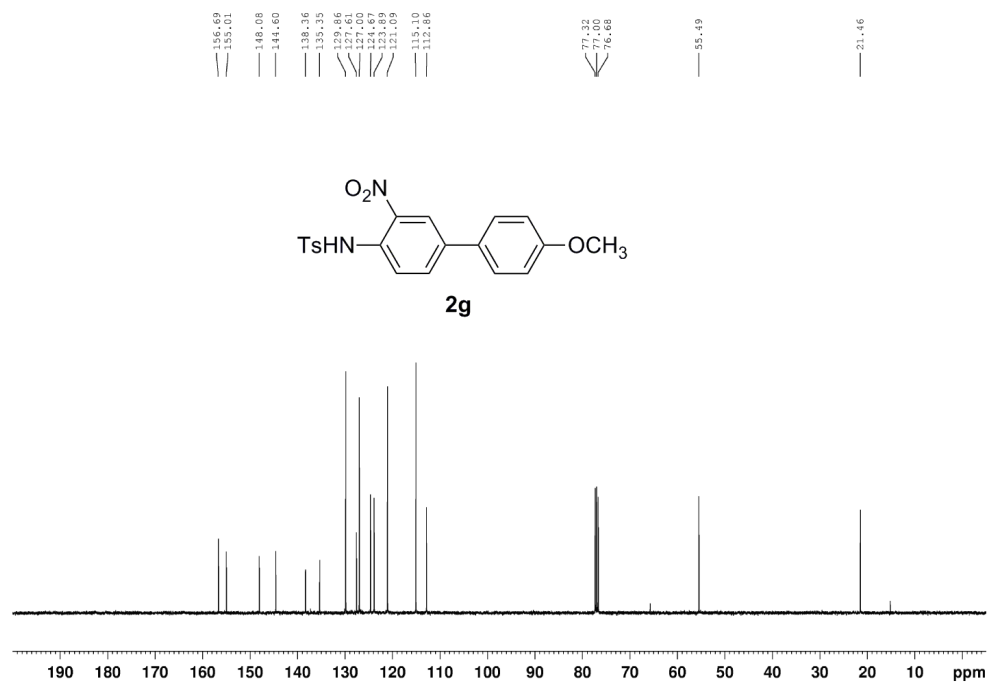

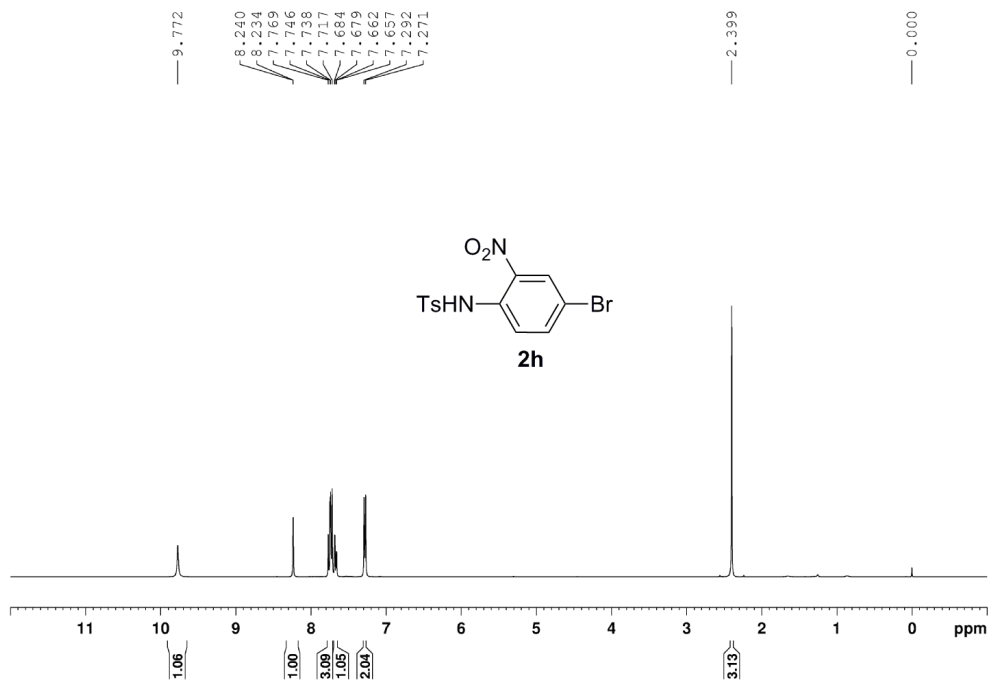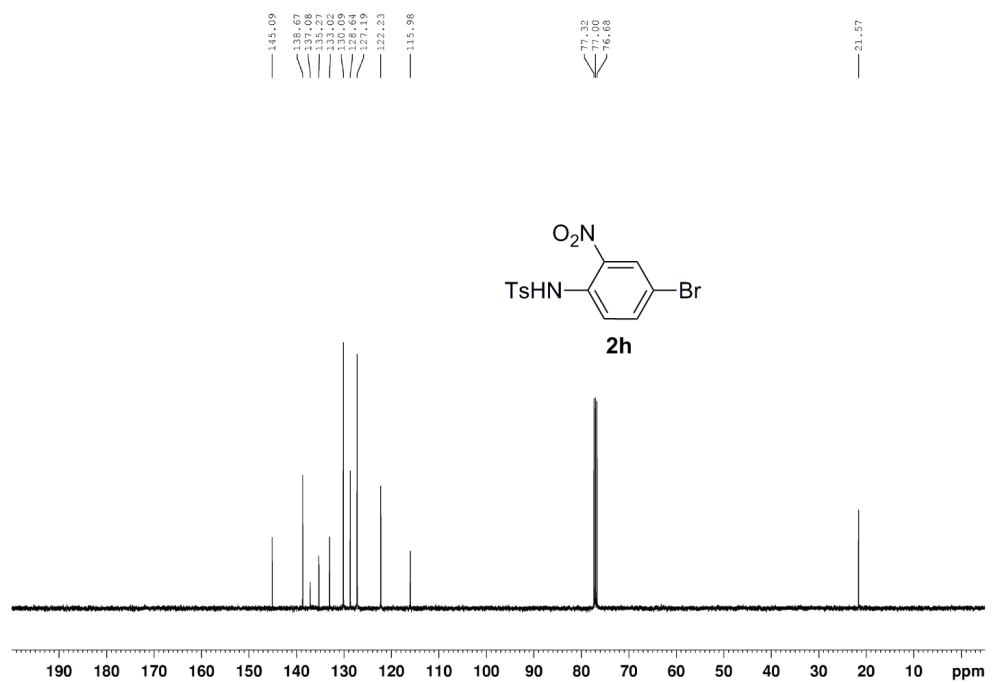

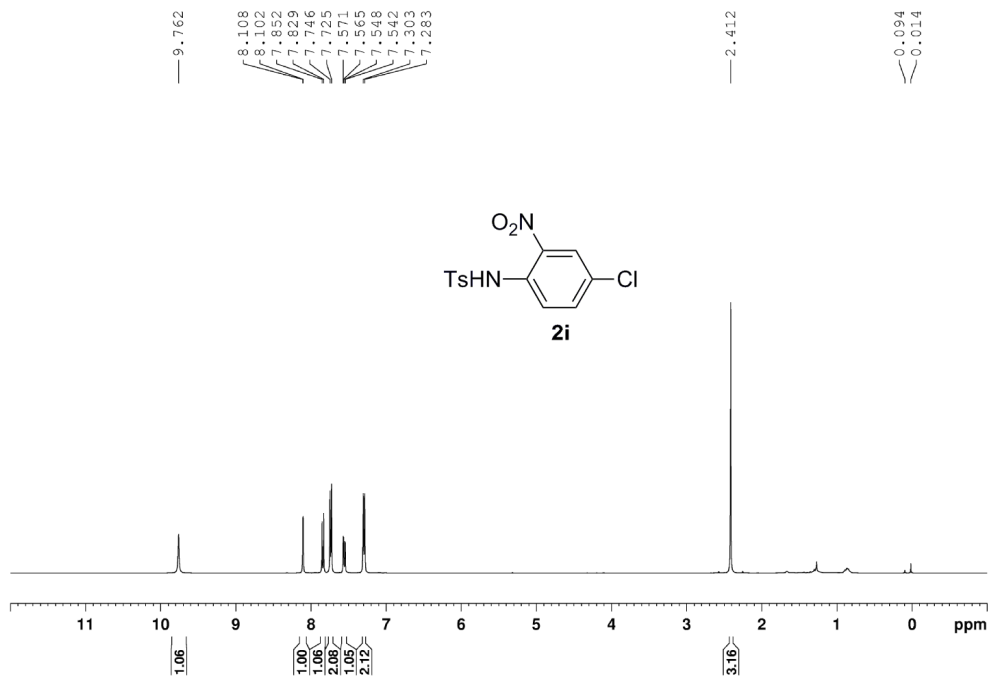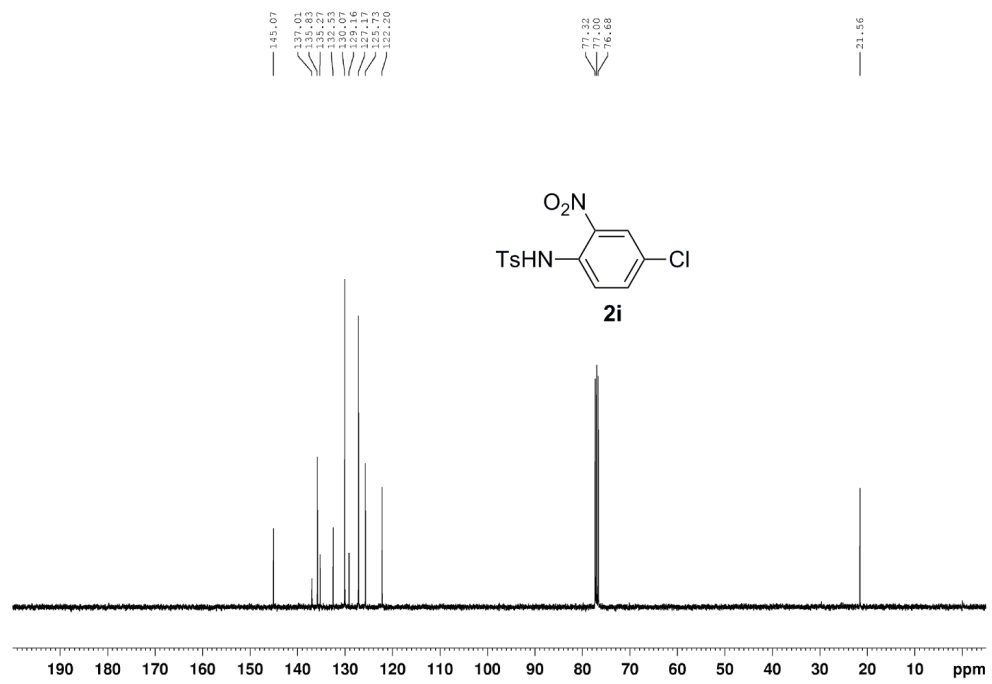



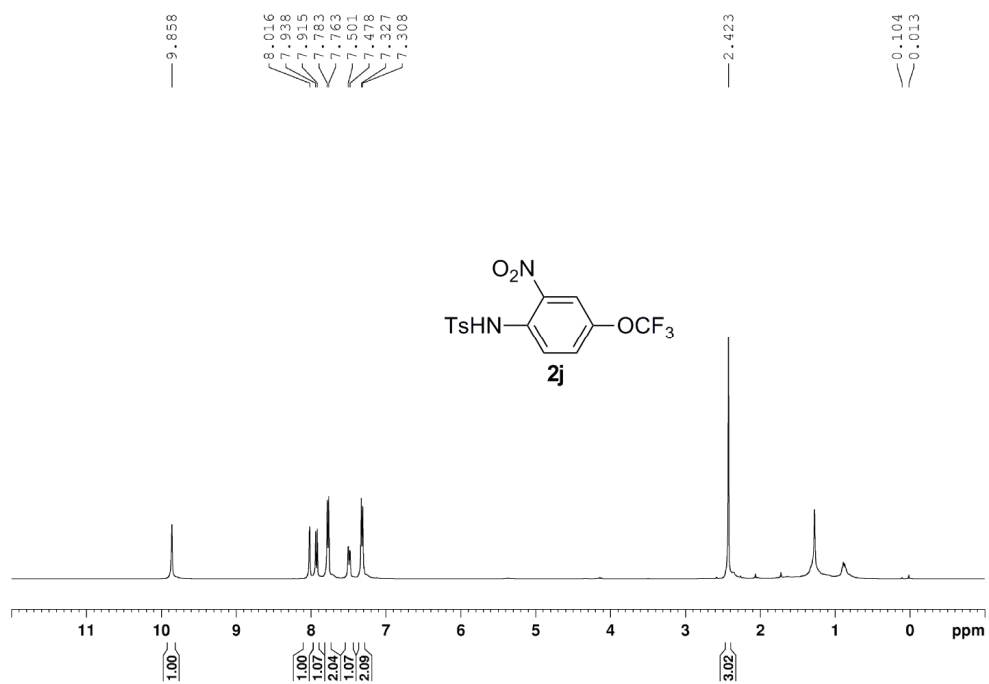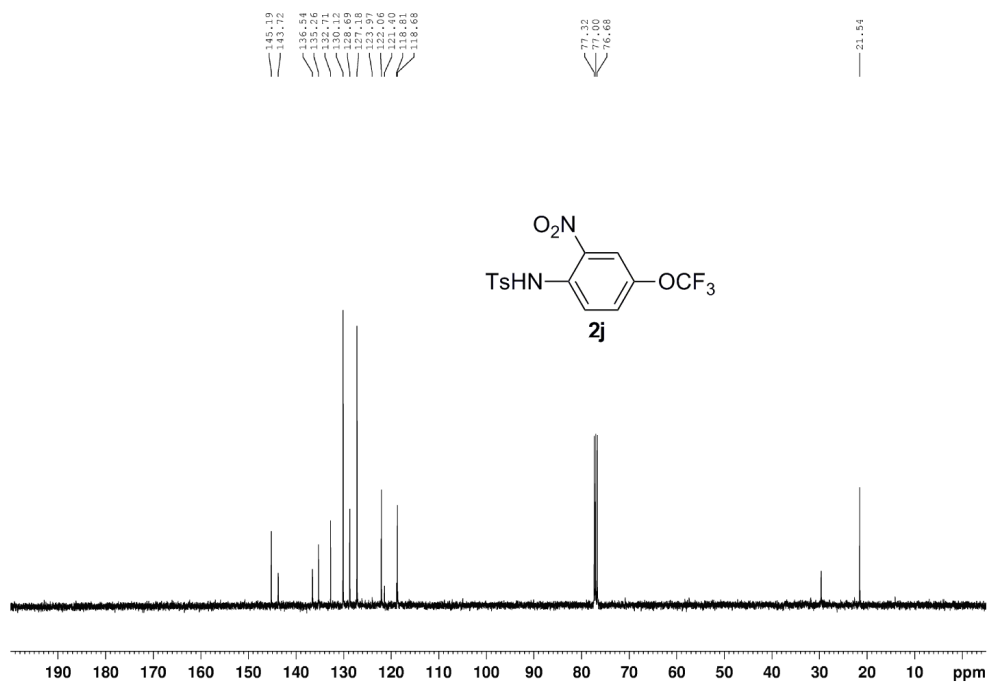

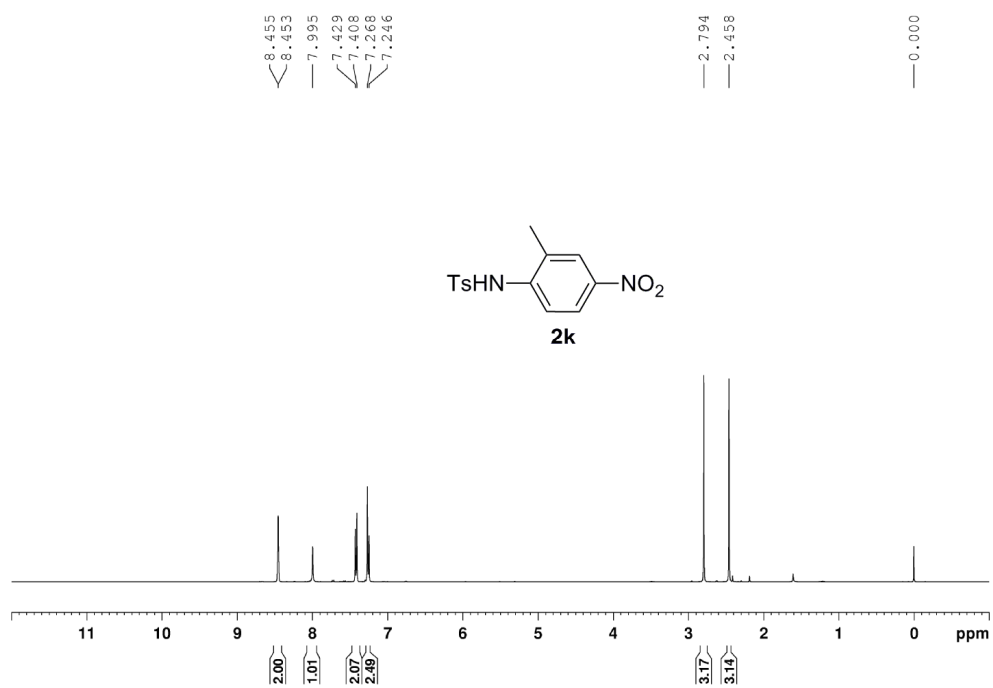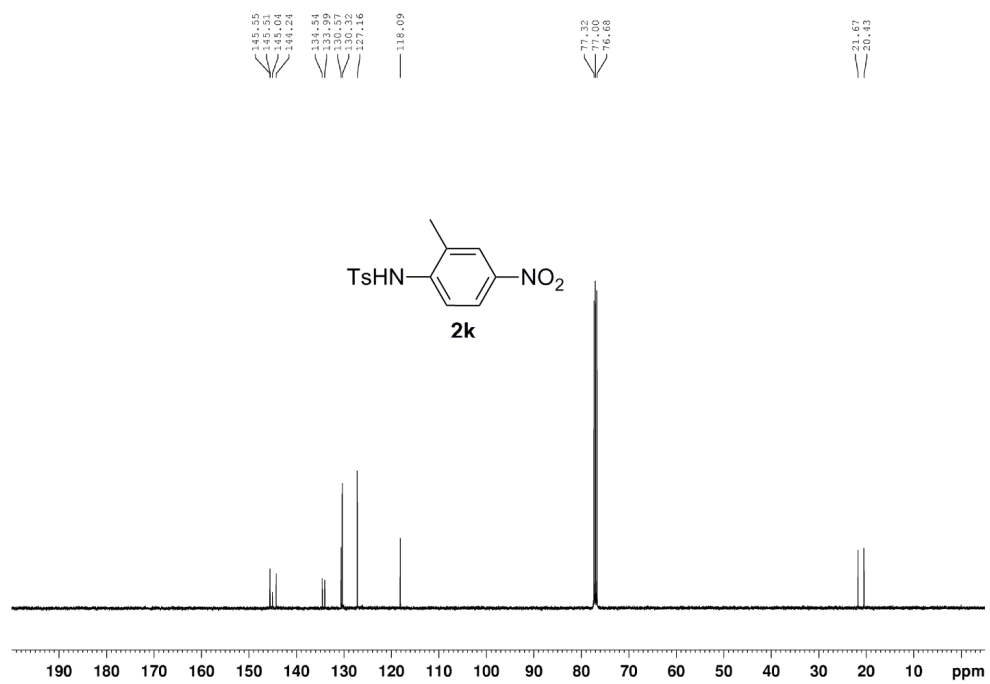

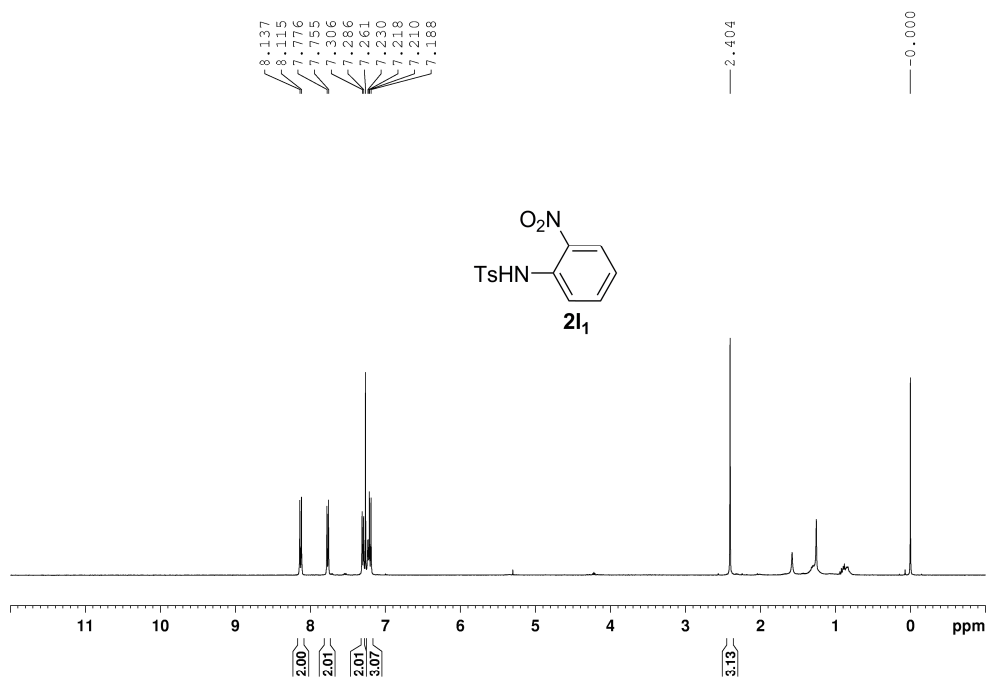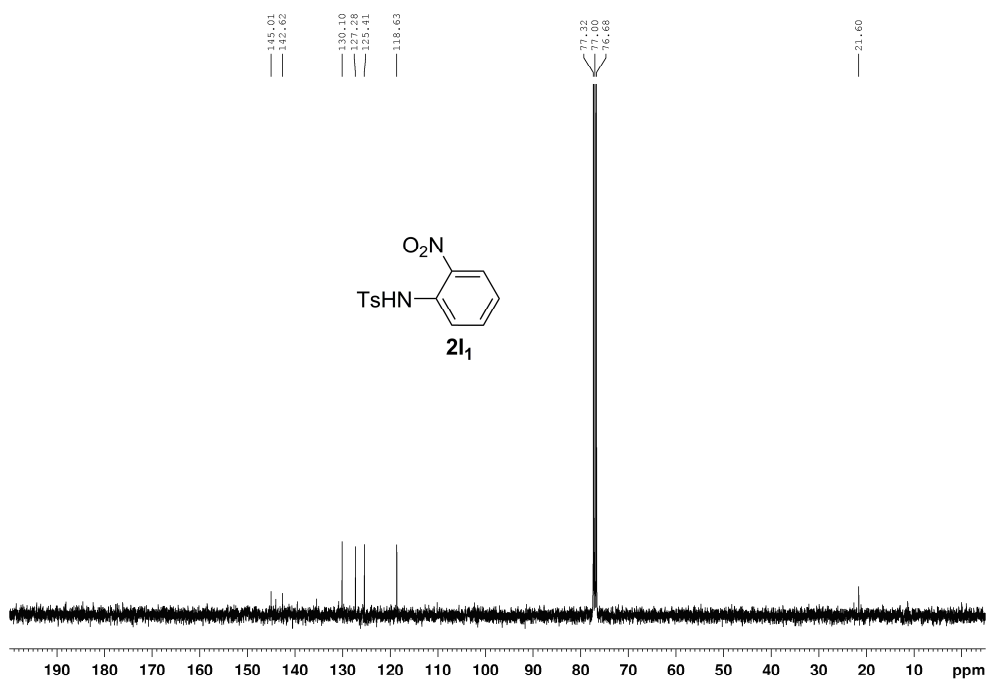

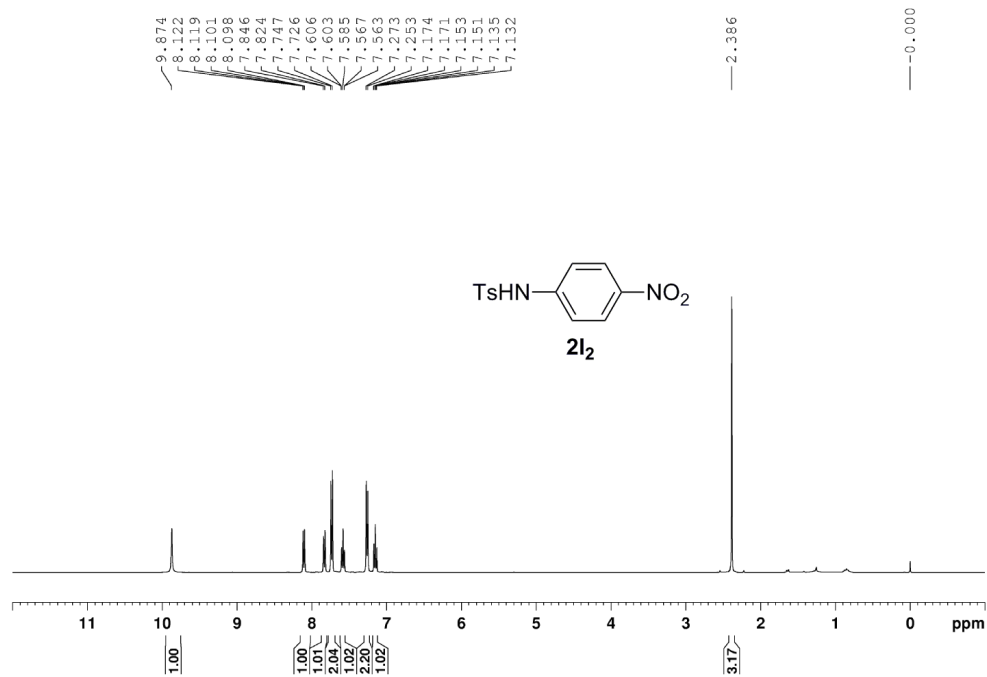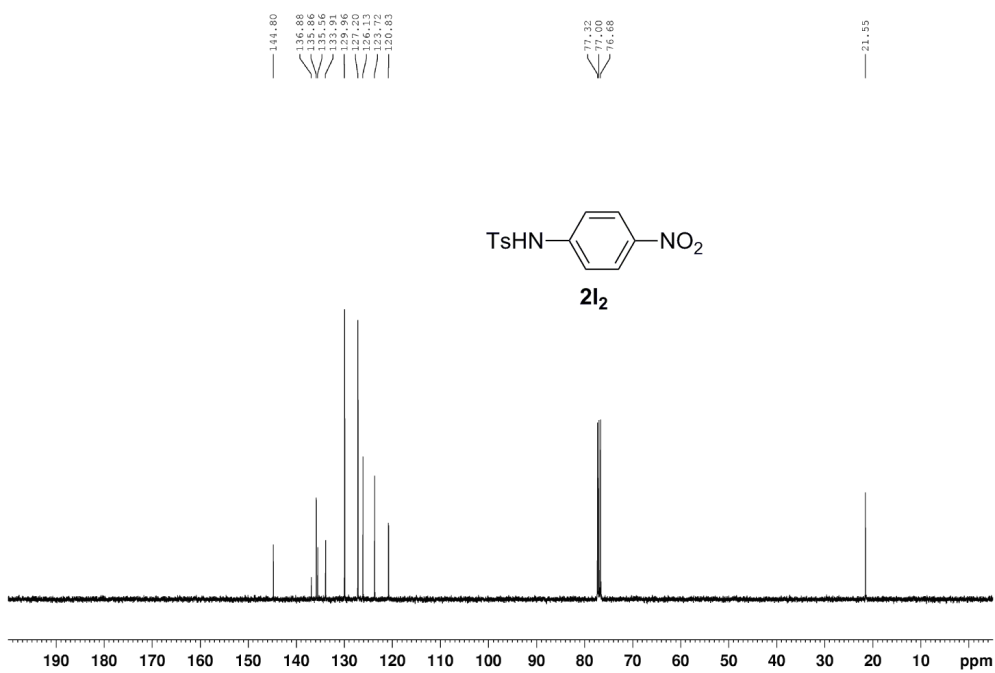

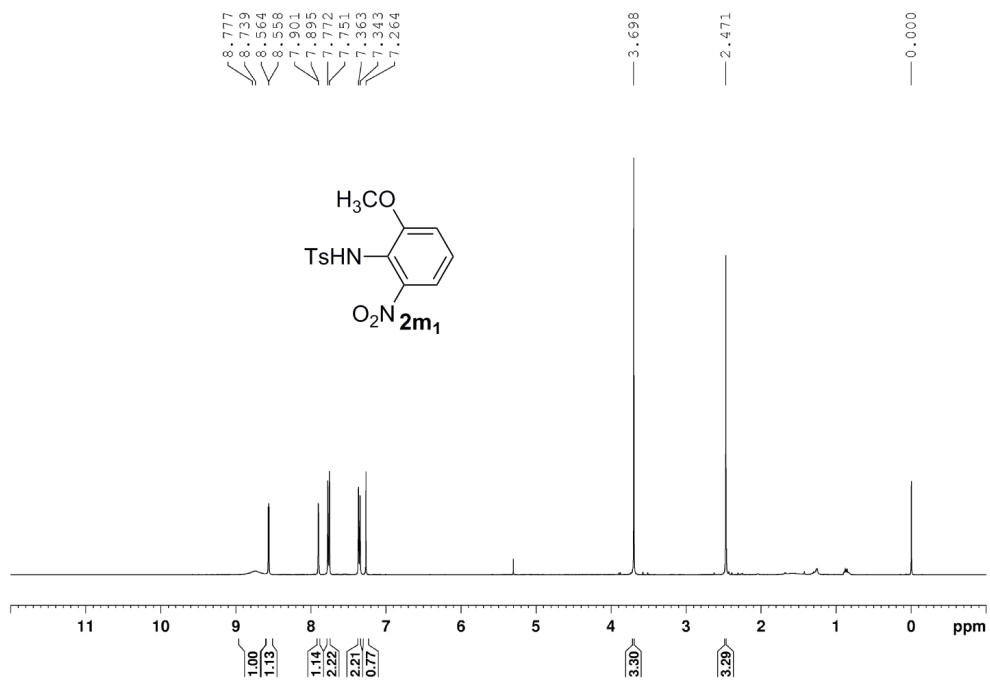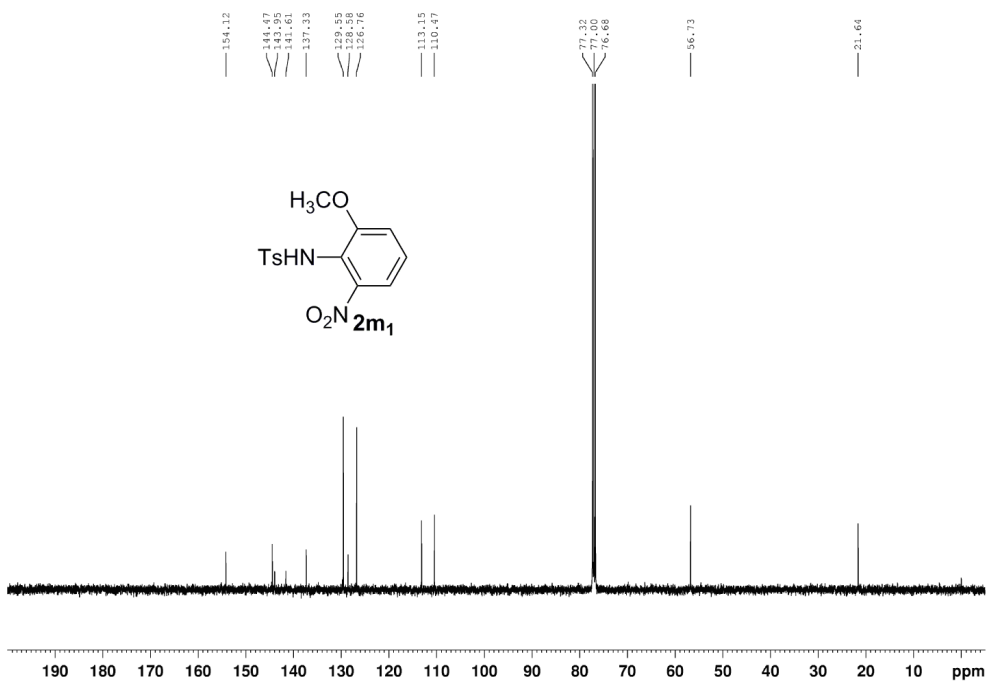

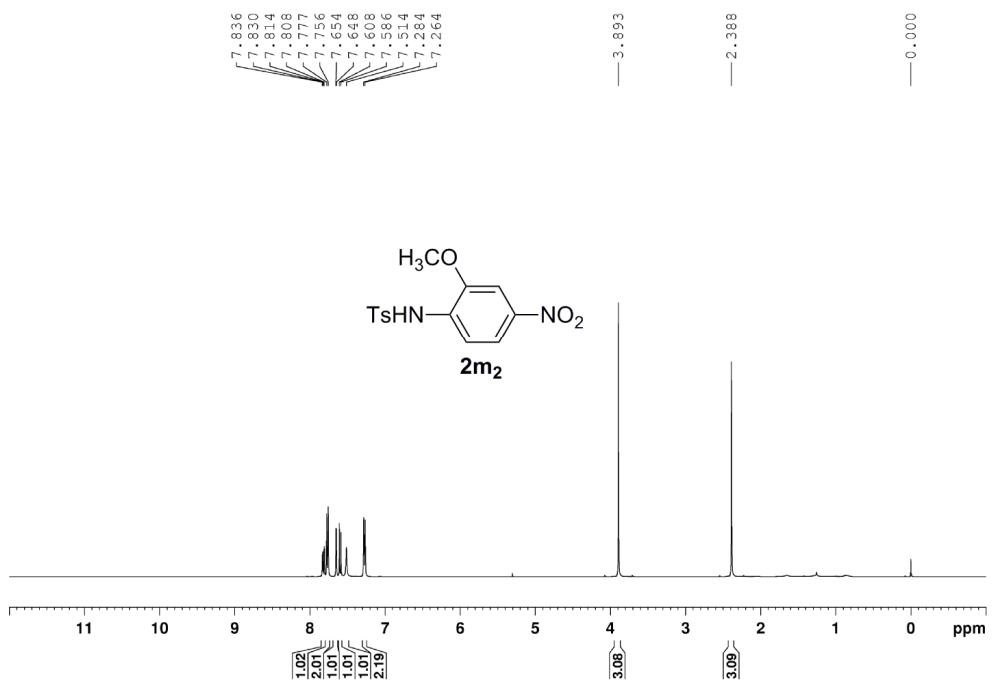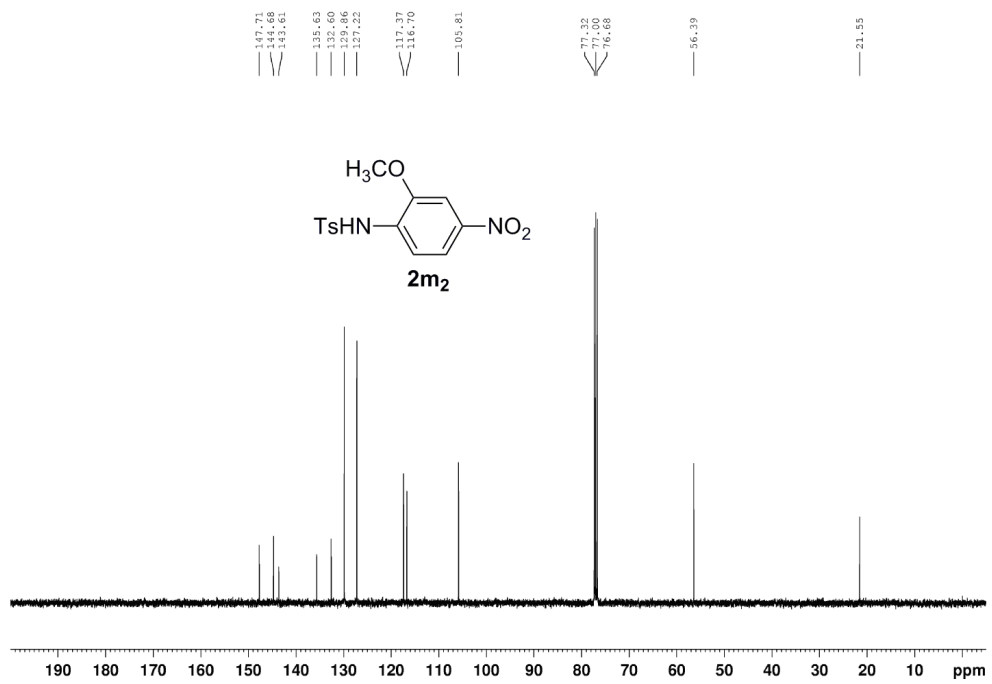

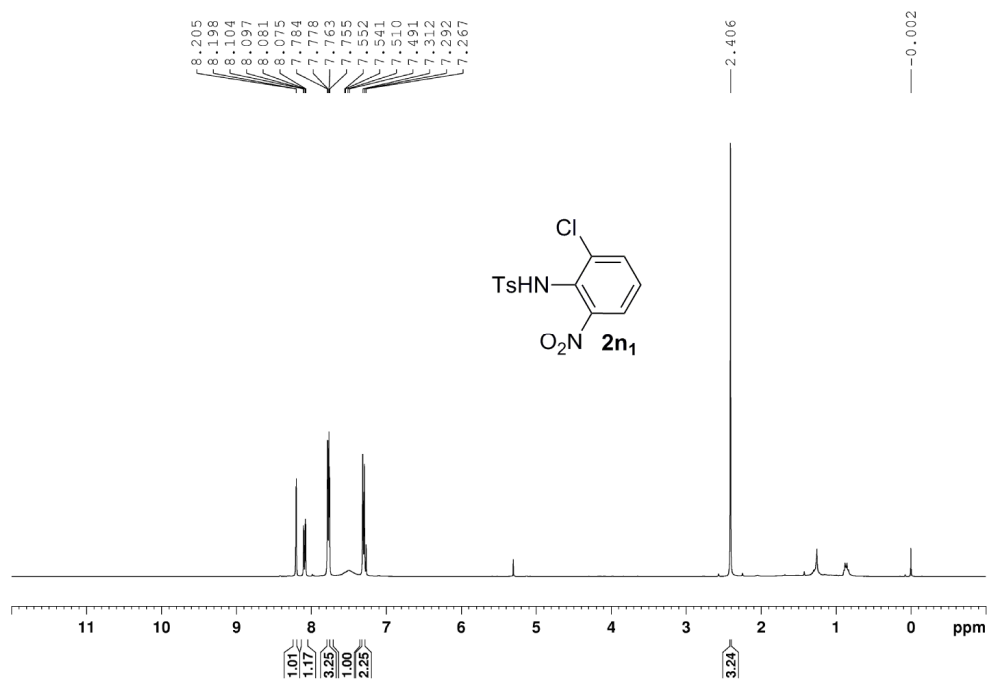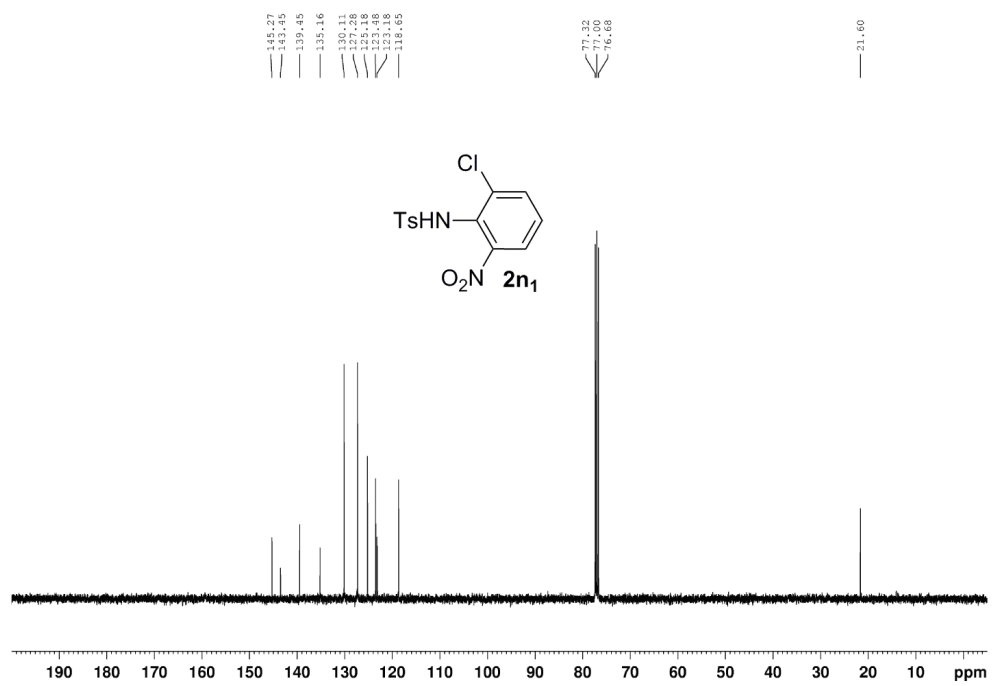

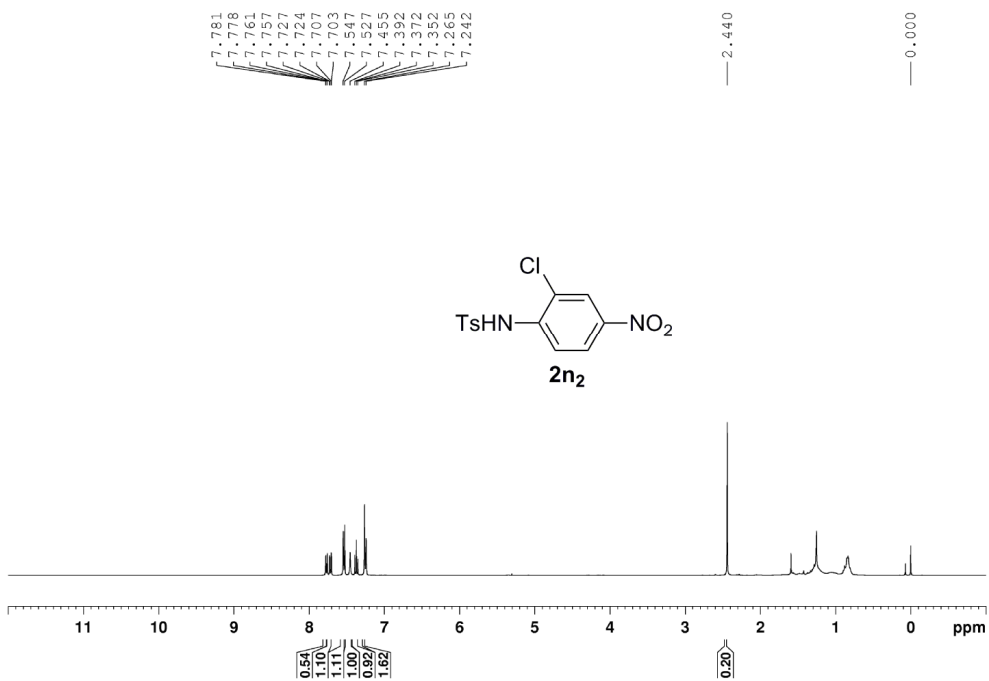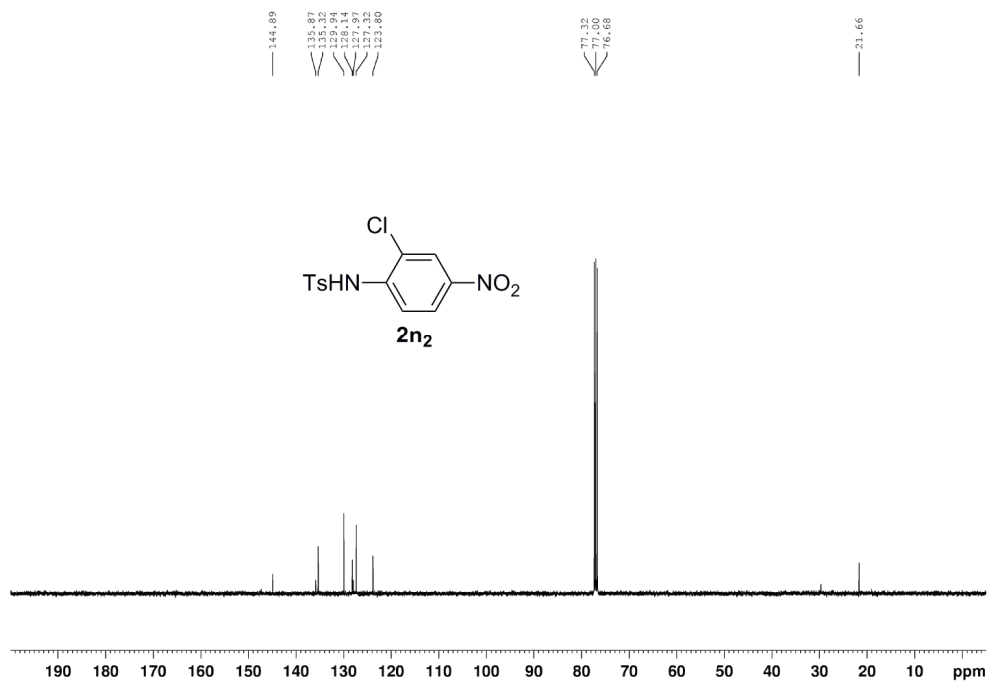



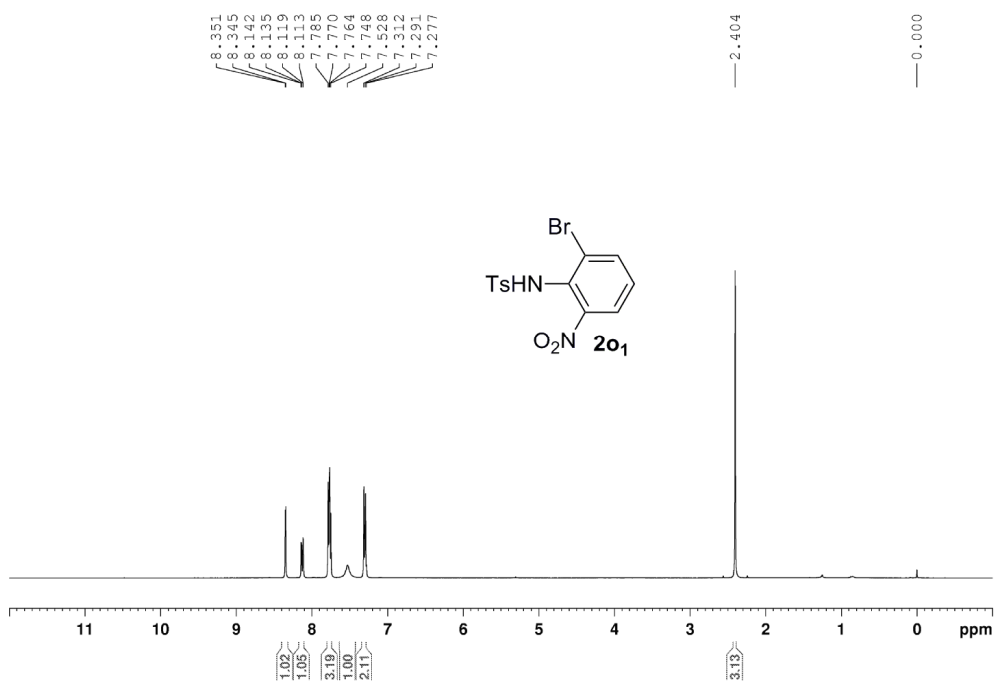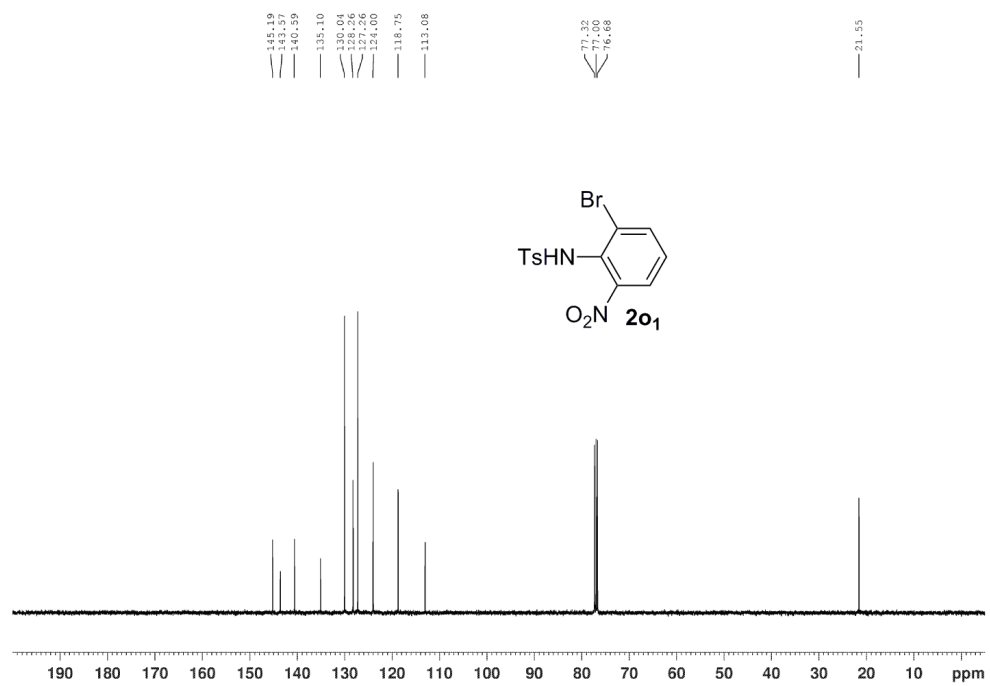

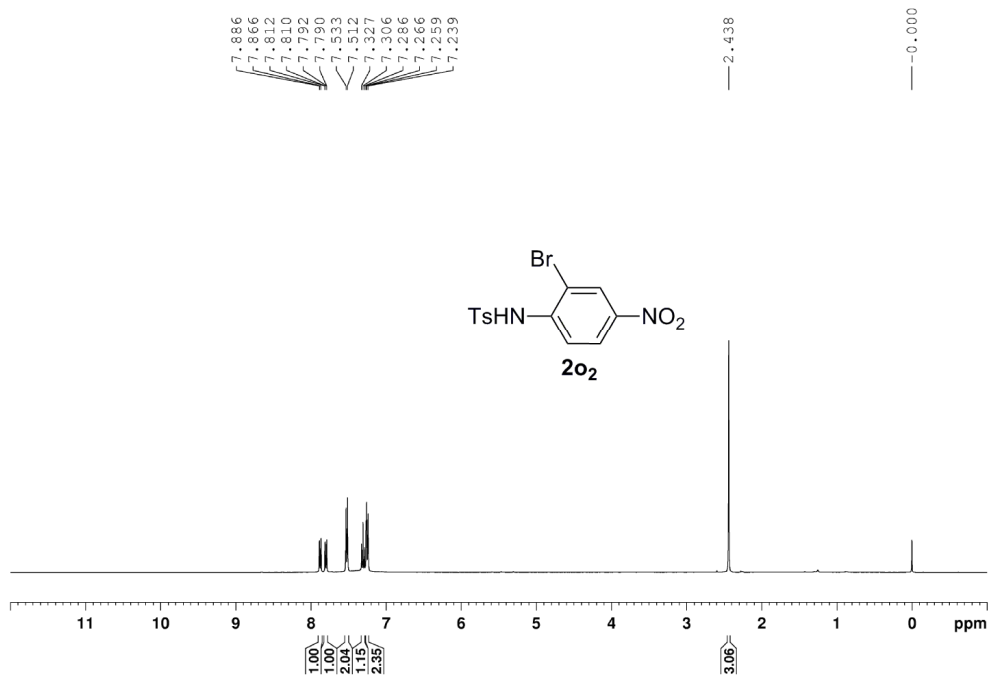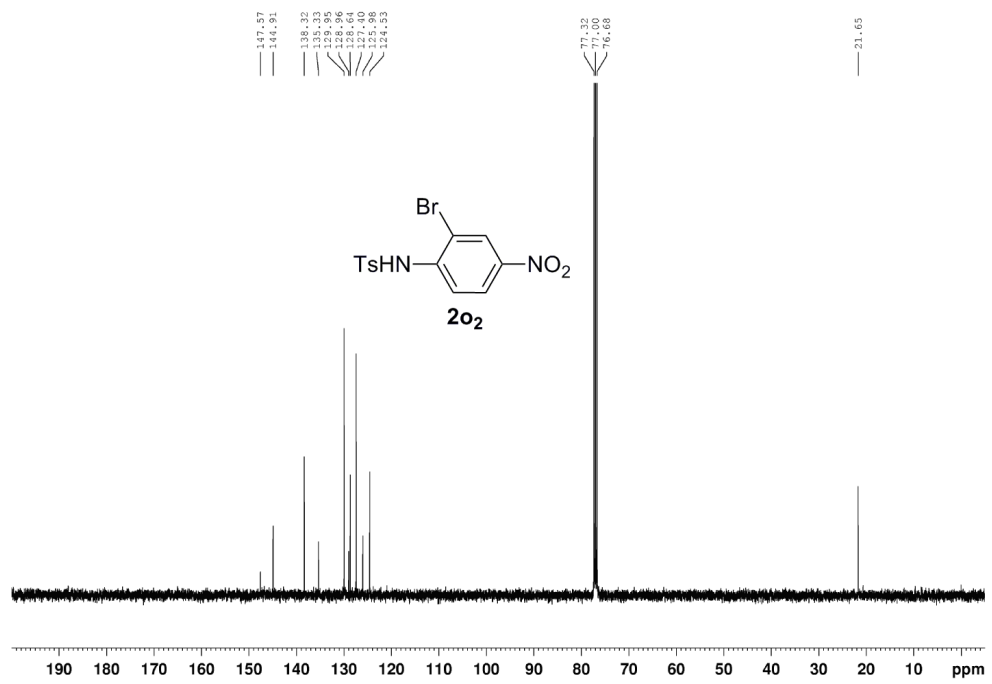

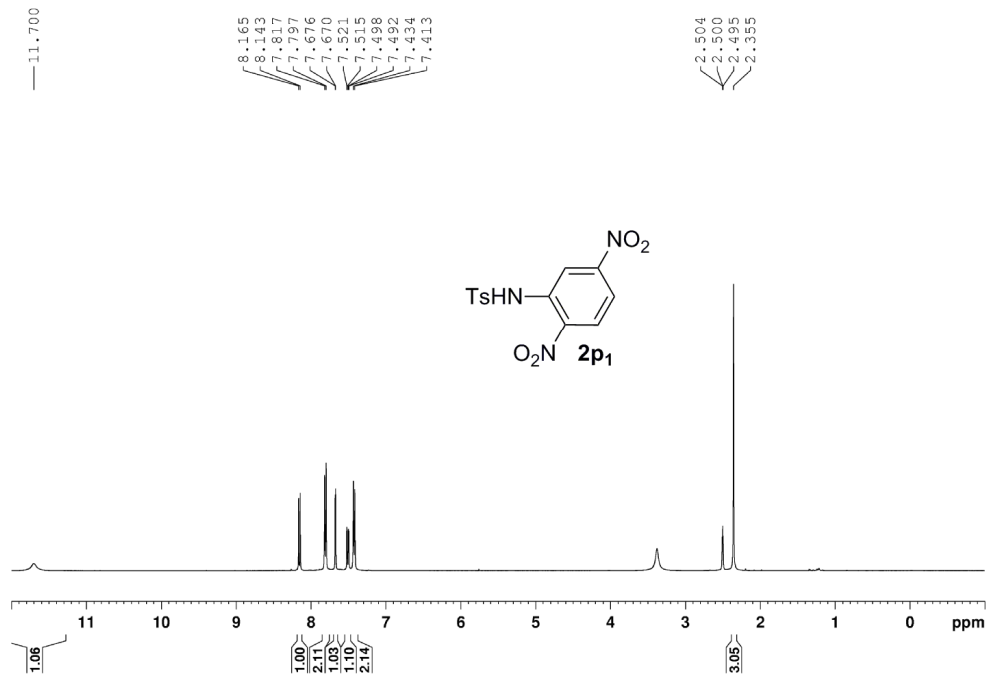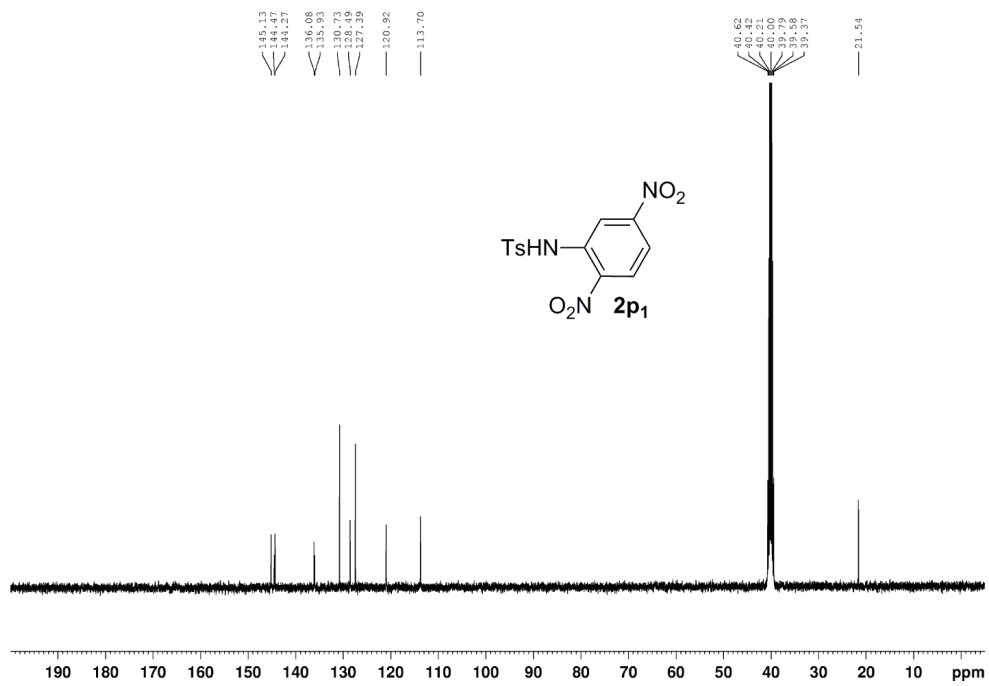

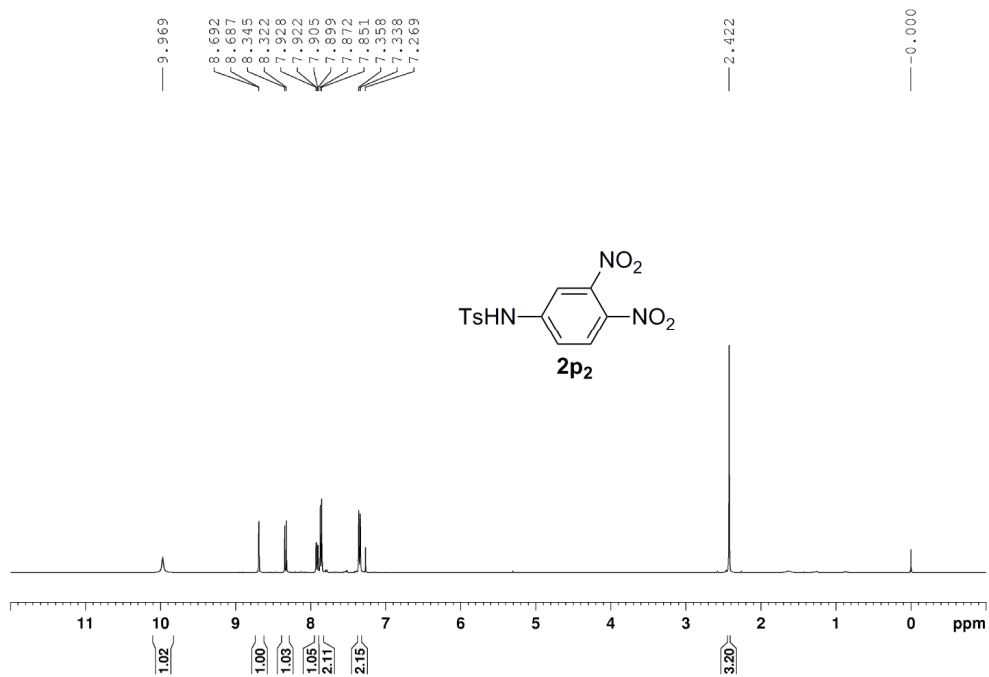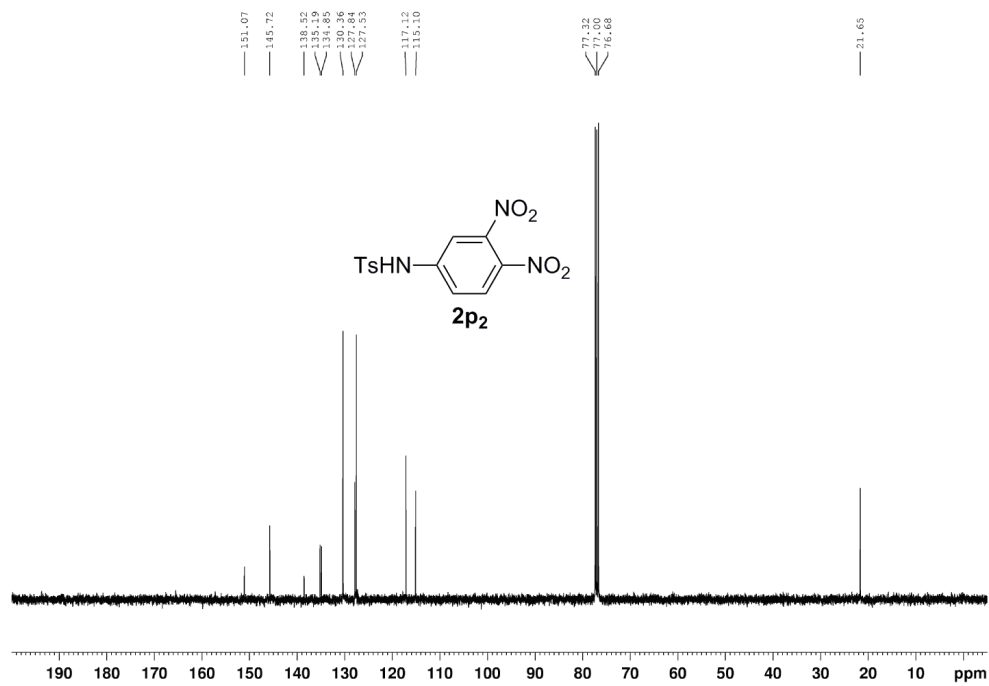

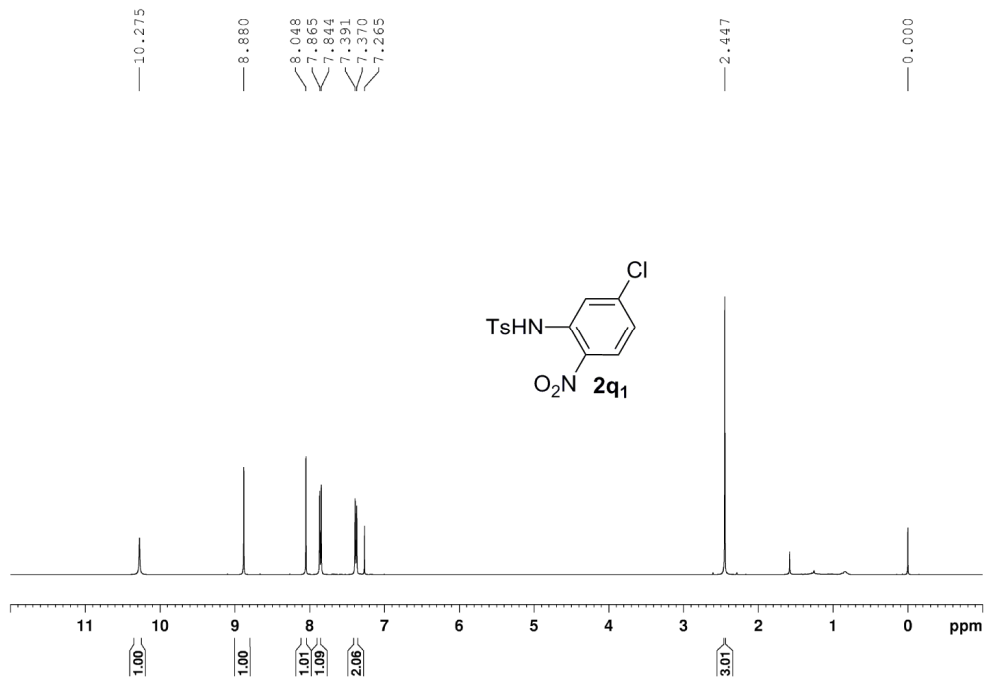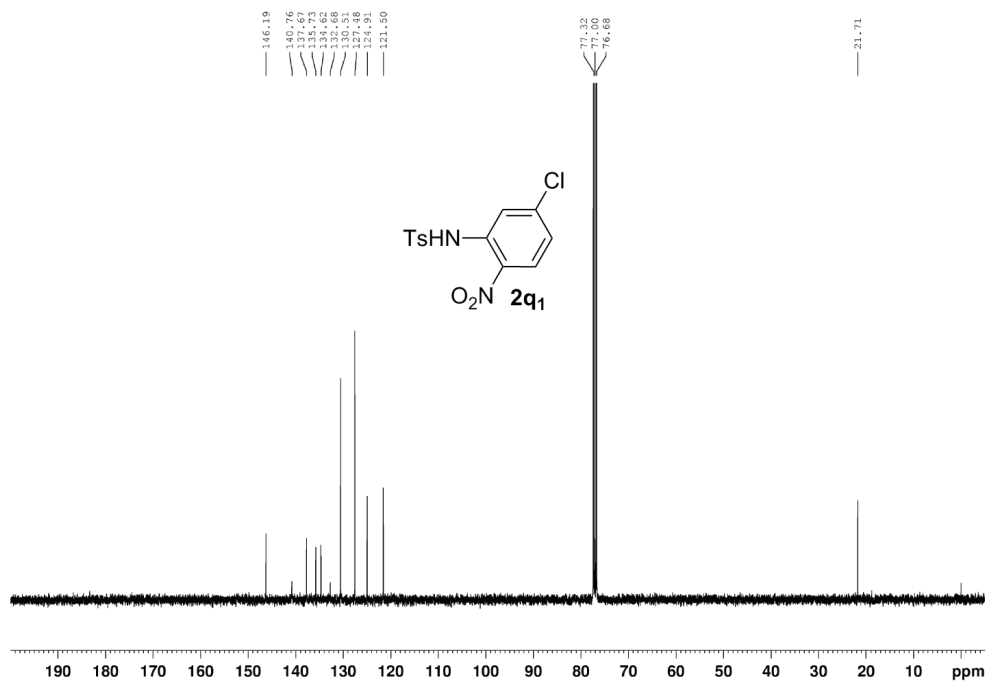

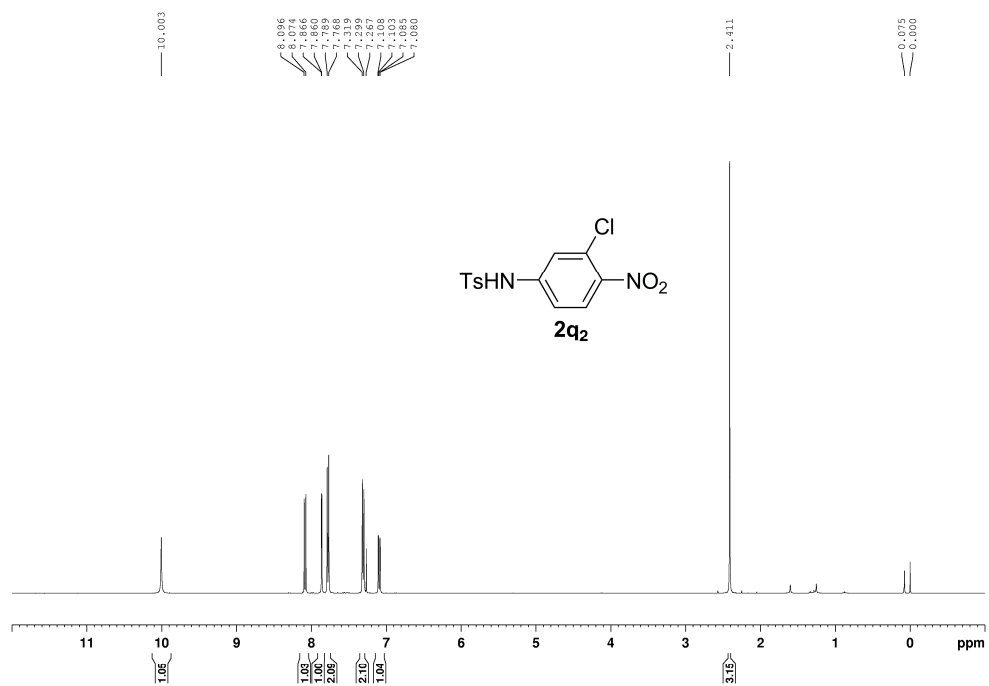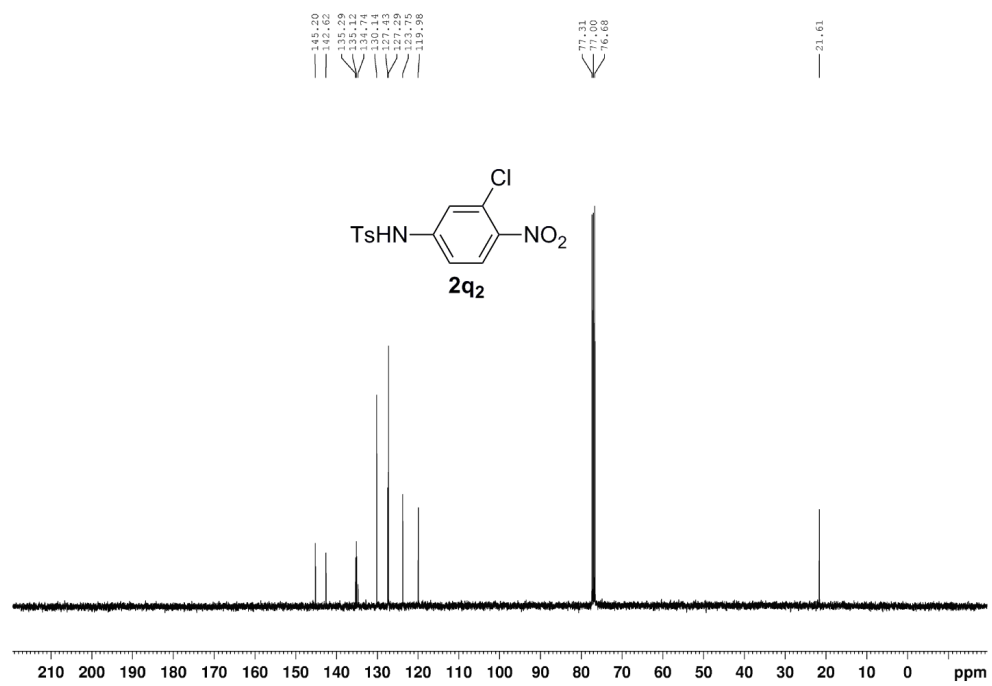

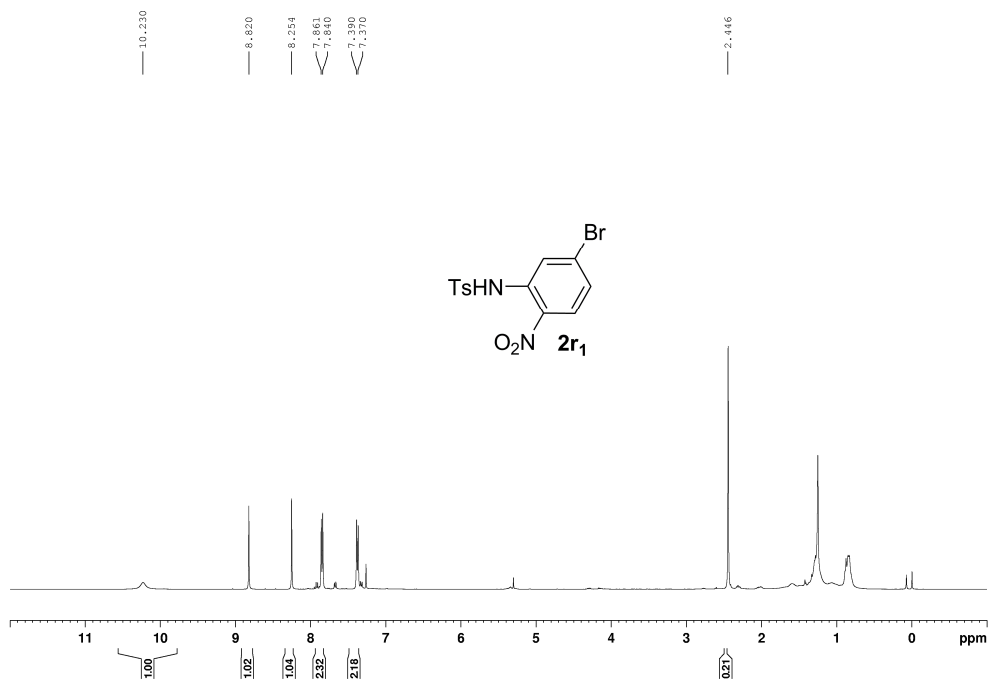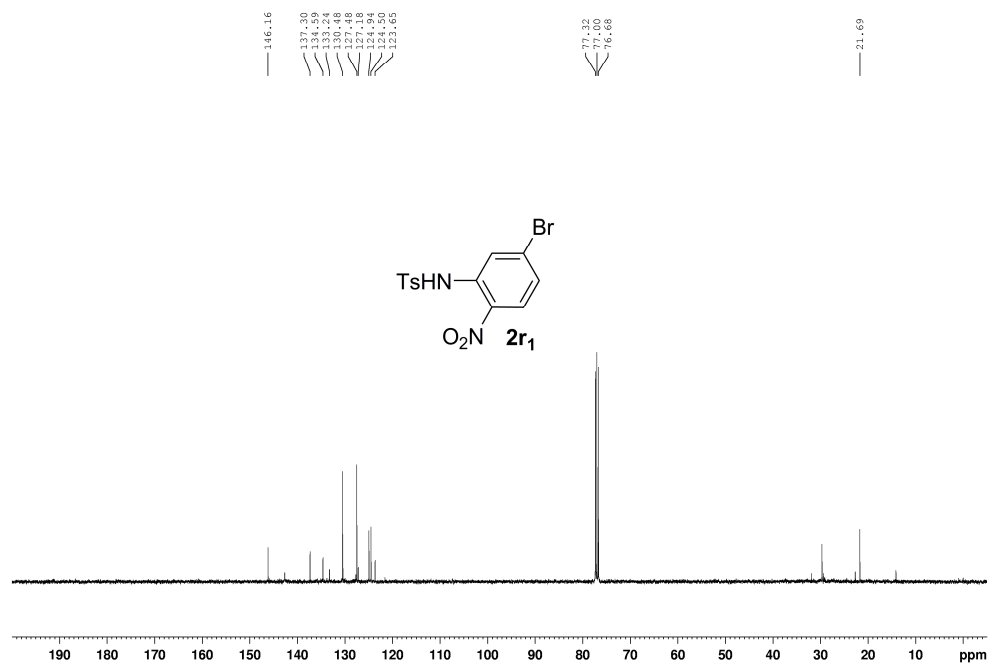

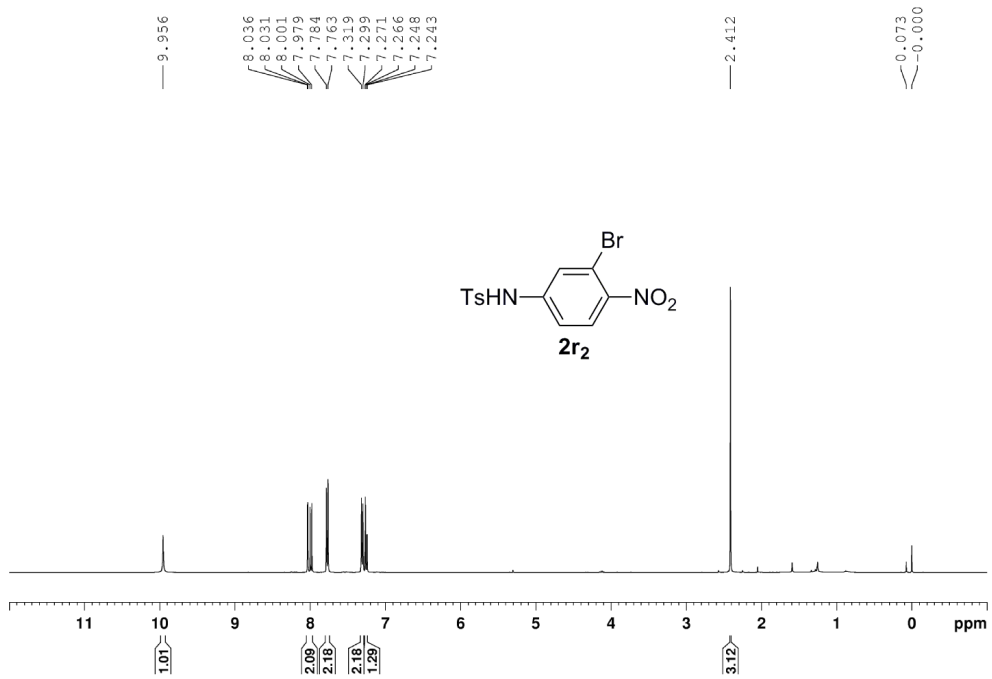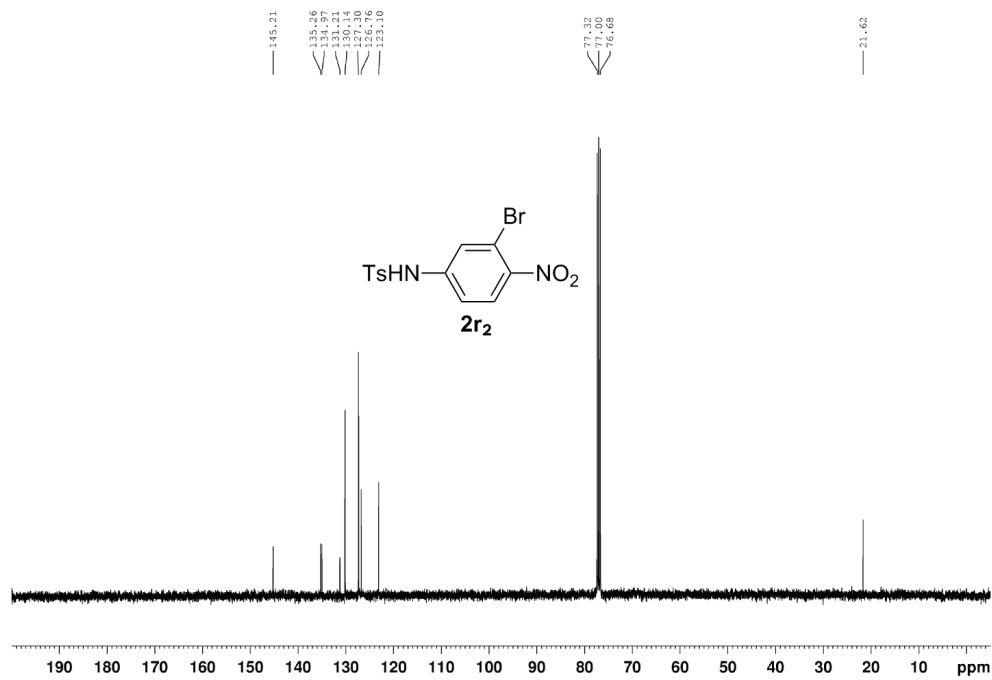



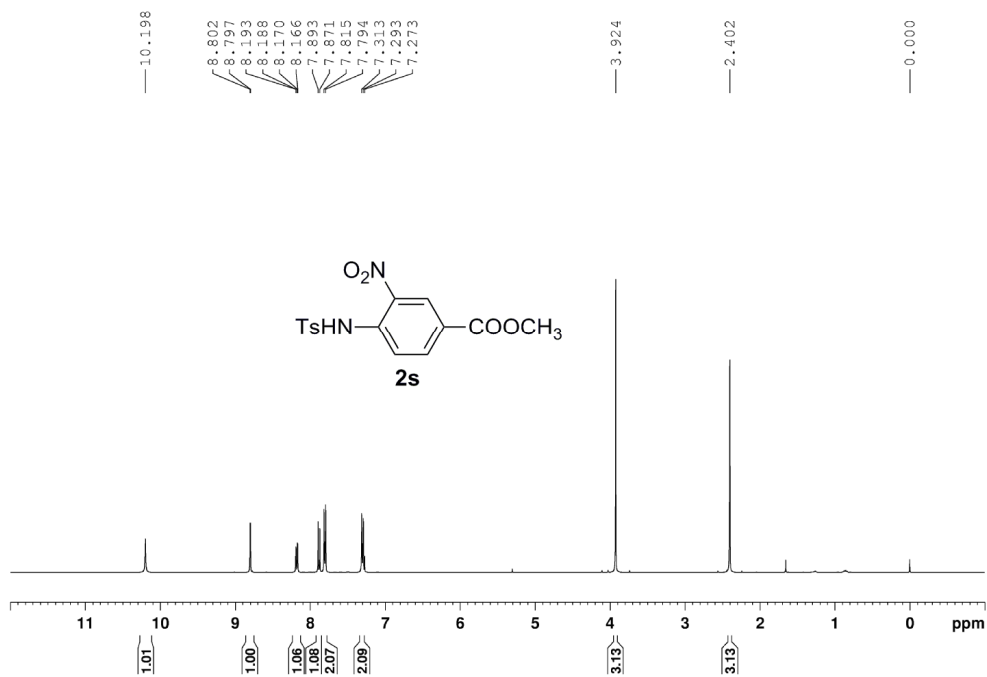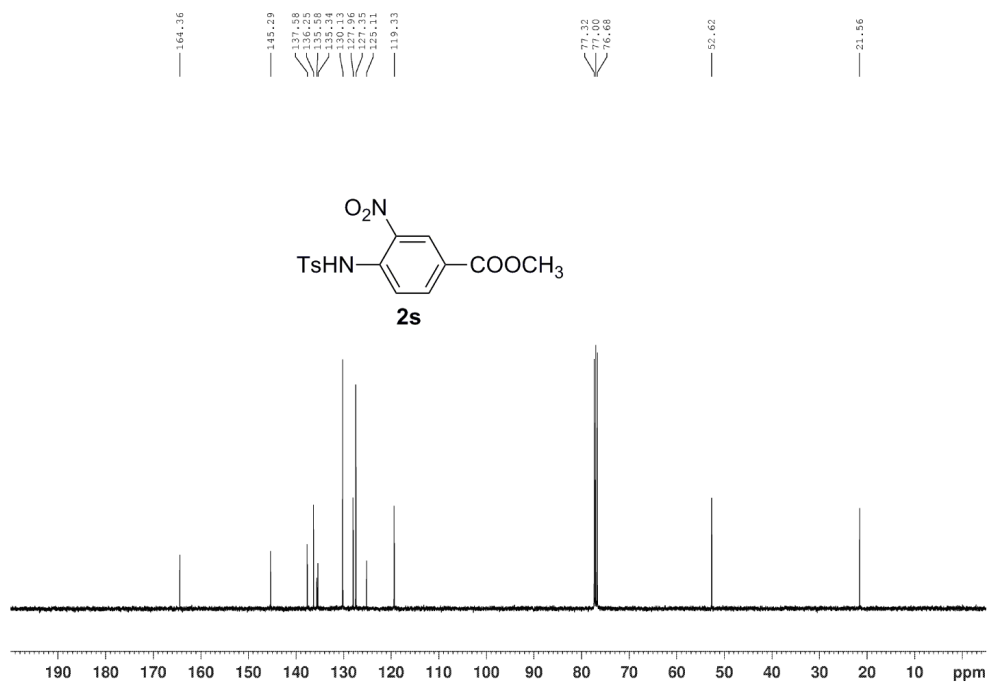

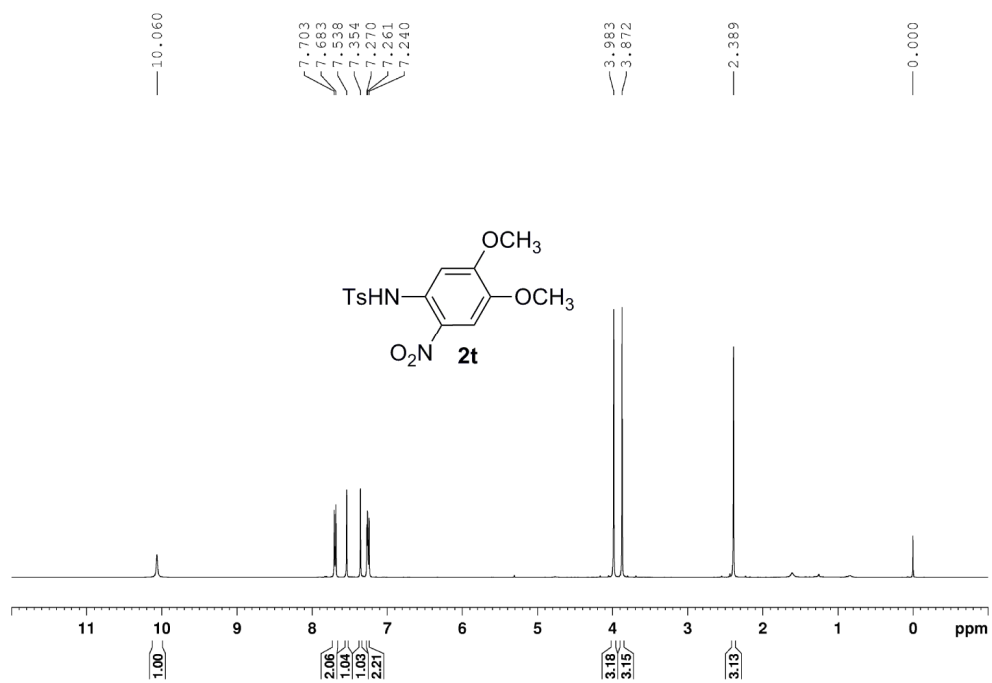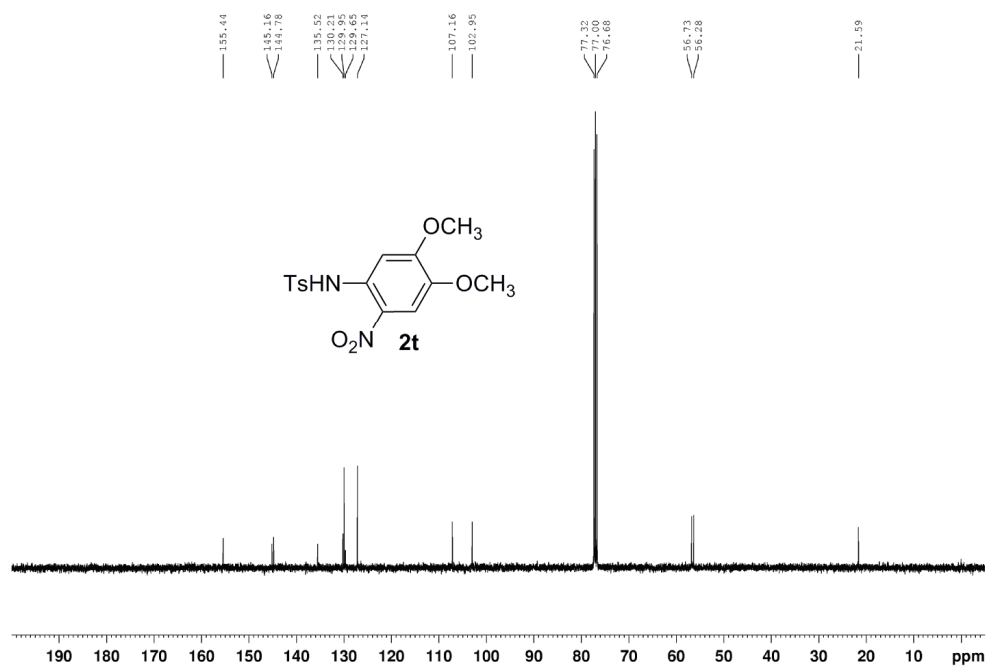

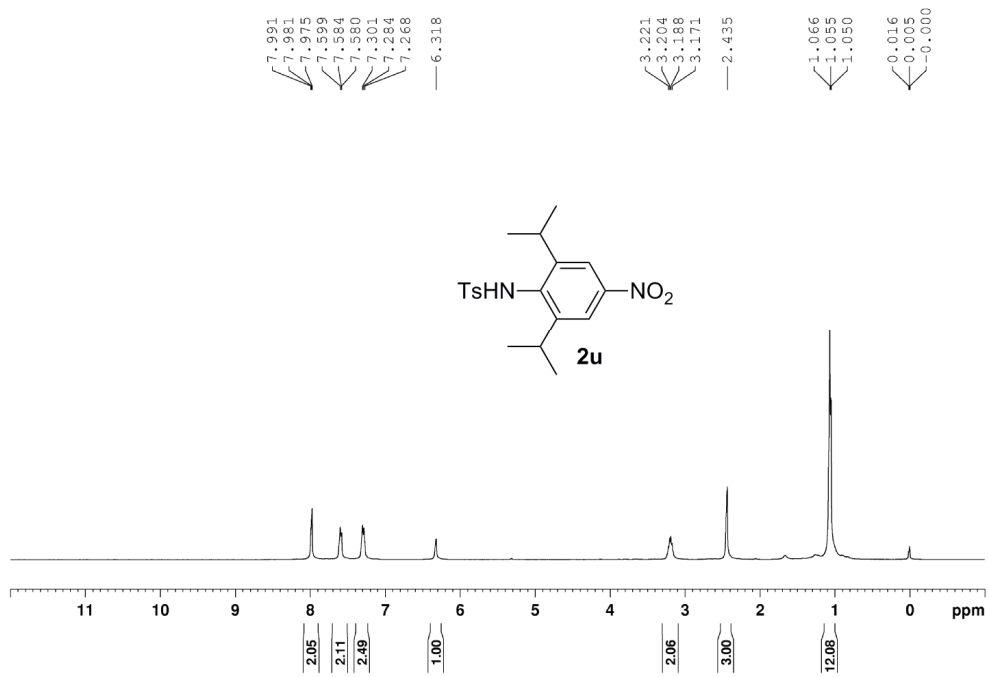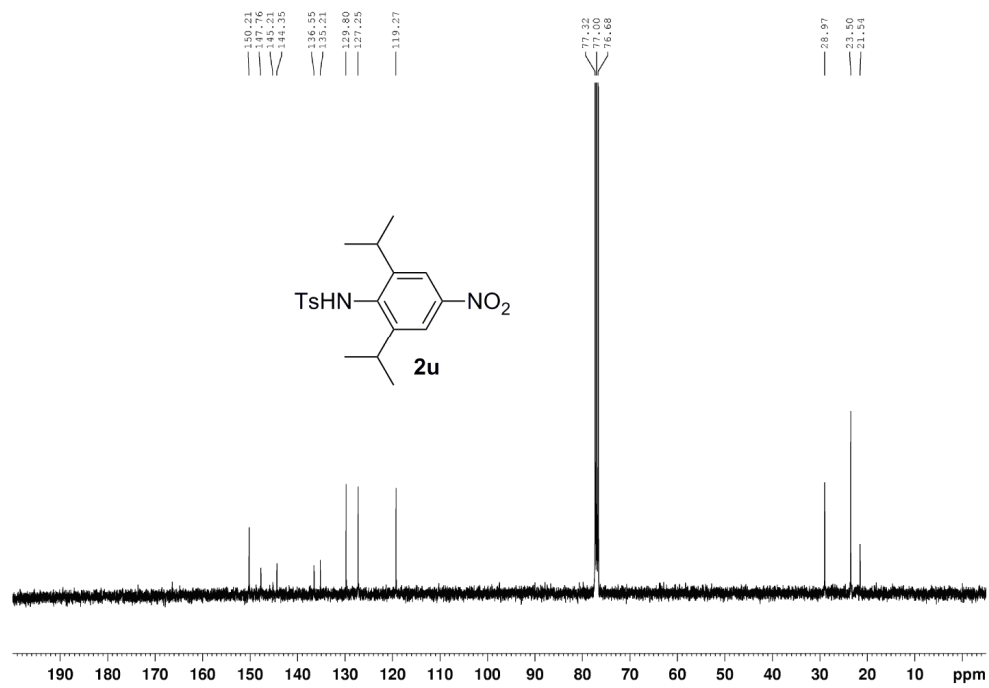

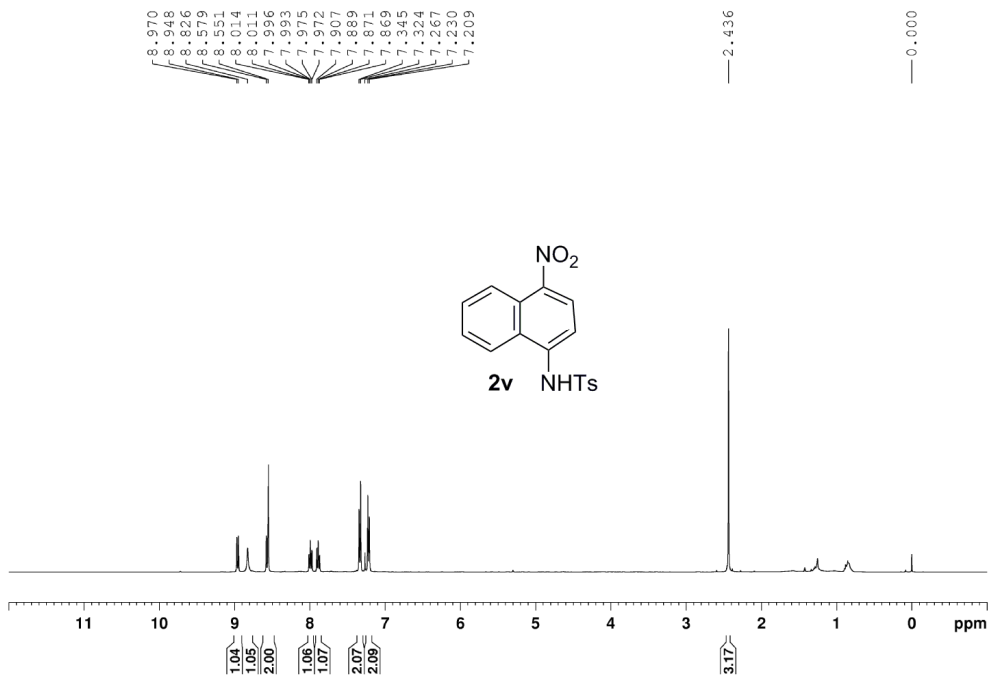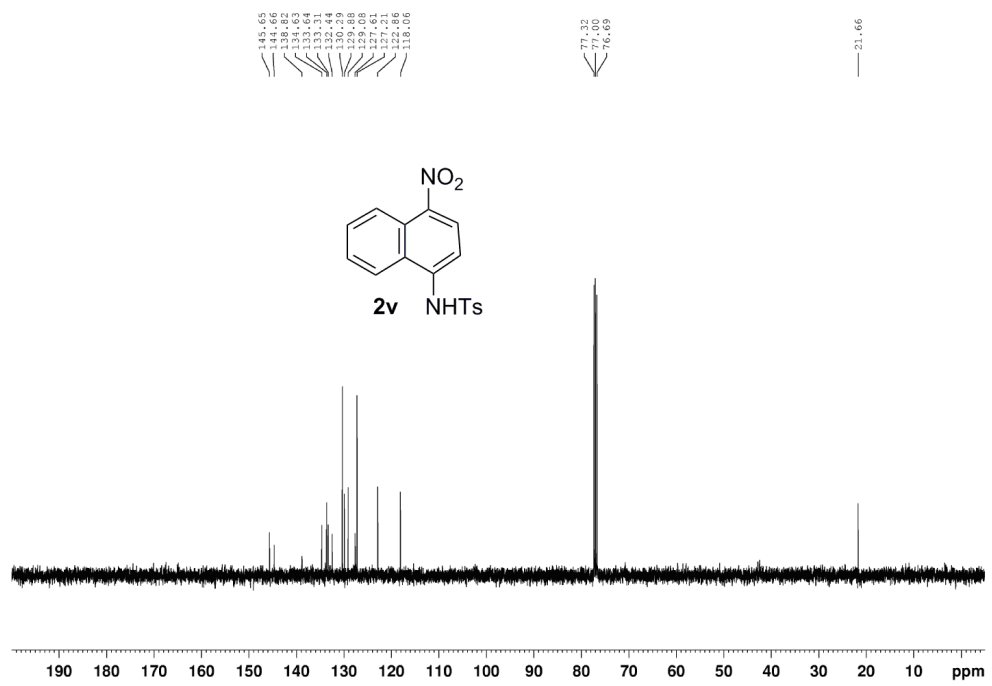

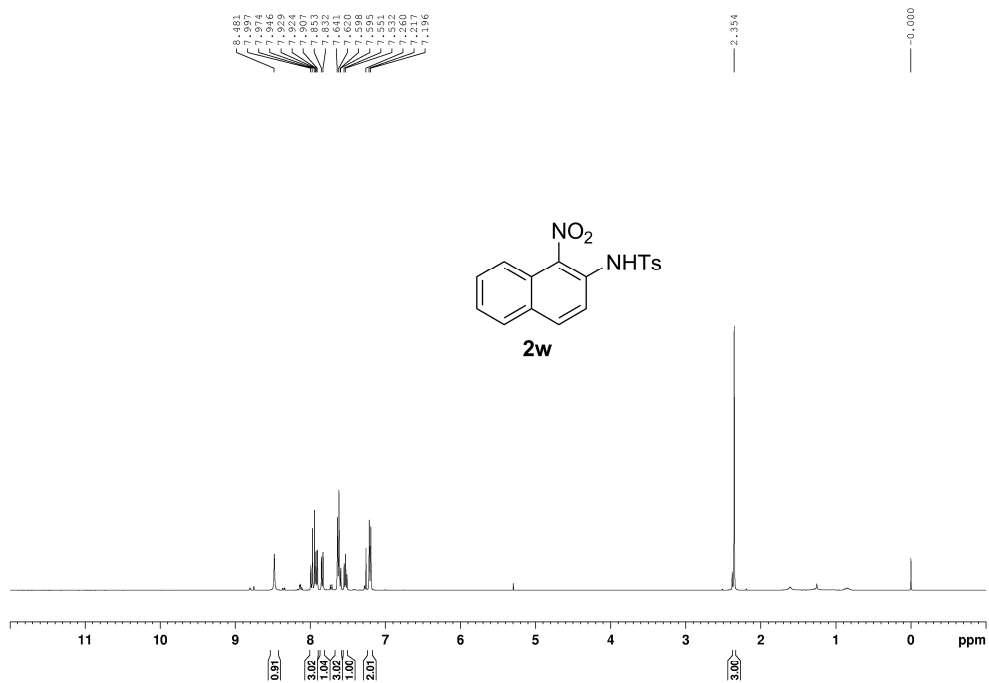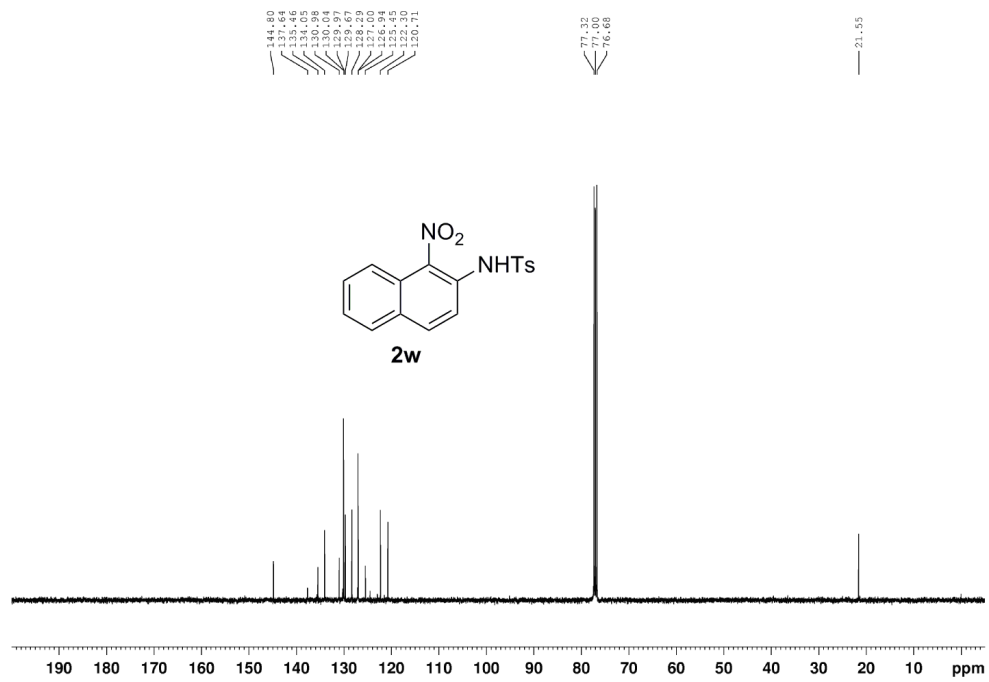

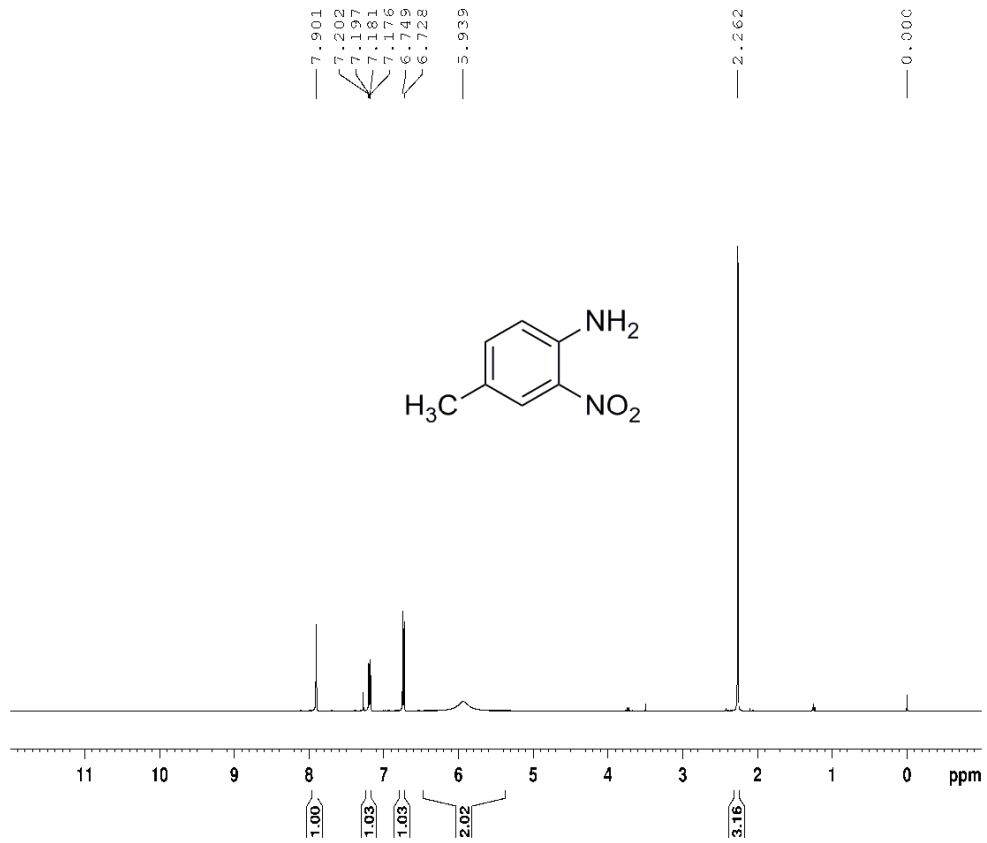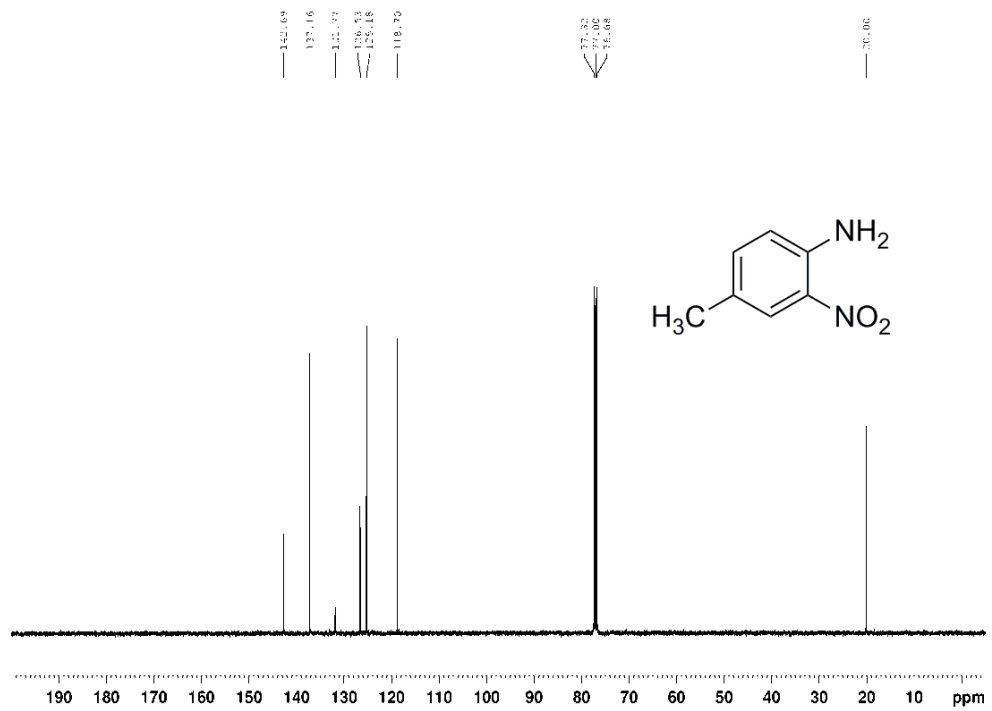

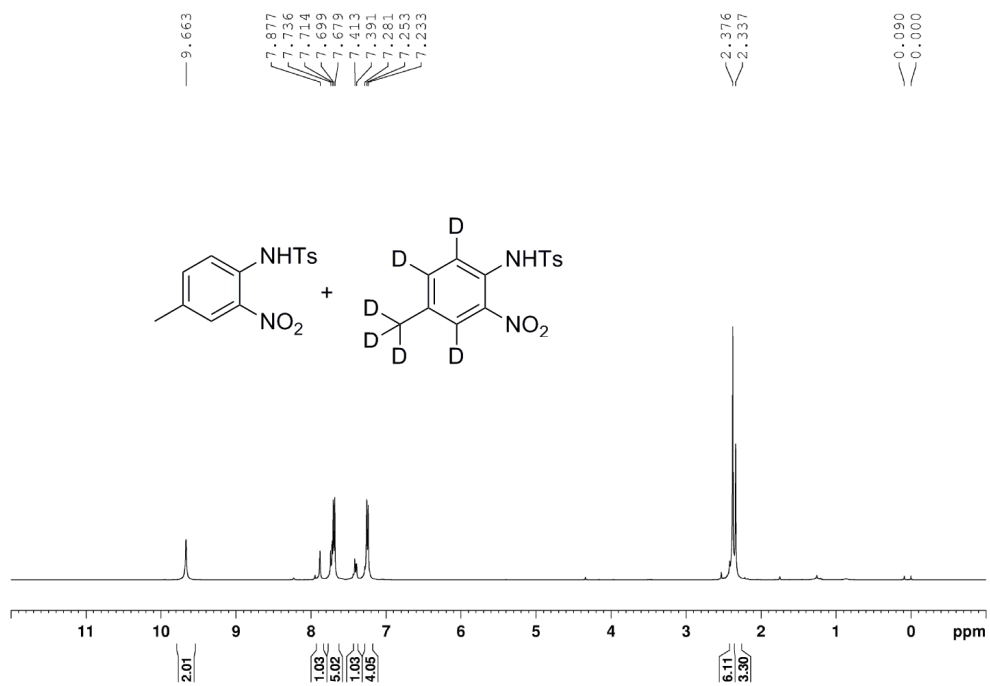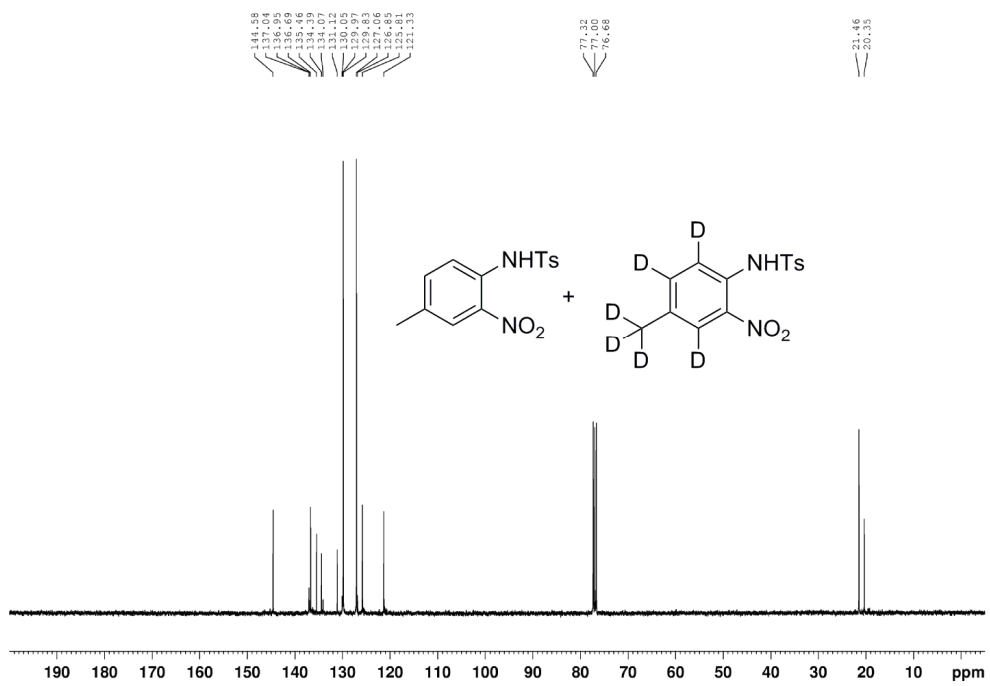

## 7. Electron paramagnetic resonance (EPR) for 2a.

WinEPR Acquisition

Date: 12/13/2013 Time: 17:17

FileName: C:\Documents and Settings\Administrator\Desktop\LYX-Yuantixi.par

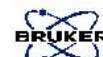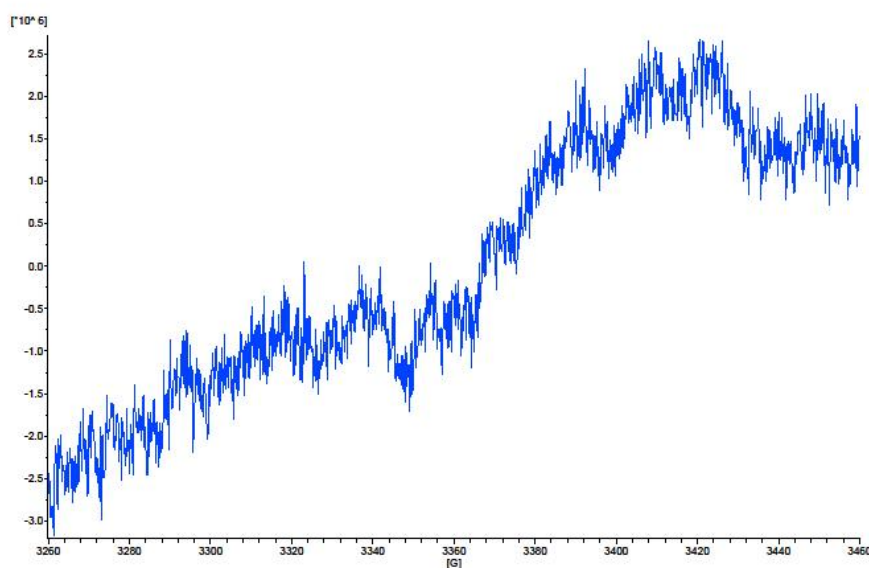

| Parameter List        |                  |
|-----------------------|------------------|
| Operator:             | Administrator    |
| Resonator:            | c:\_ins0526ic.ca |
| Acq. Date:            | 12/13/2013       |
| # of Scans:           | 5                |
| <b>Field</b>          |                  |
| Center Field:         | 3360.000 G       |
| Sweep Width:          | 200.000 G        |
| Resolution:           | 1500 points      |
| <b>Microwave</b>      |                  |
| Frequency:            | 9.445 GHz        |
| Power:                | 24.347 mW        |
| <b>Receiver</b>       |                  |
| Receiver Gain:        | 2.00e+005        |
| Phase:                | 0.00 deg         |
| Harmonic:             | 1                |
| Mod. Frequency:       | 100.00 kHz       |
| Mod. Amplitude:       | 1.00 G           |
| <b>Signal Channel</b> |                  |
| Conversion:           | 40.000 ms        |
| Time Constant:        | 20.480 ms        |
| Sweep Time:           | 60.000 s         |

WinEPR Acquisition

Date: 12/13/2013 Time: 17:18

FileName: C:\Documents and Settings\Administrator\Desktop\LYX-Yuantixi+3mgTEMPO.par

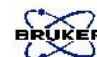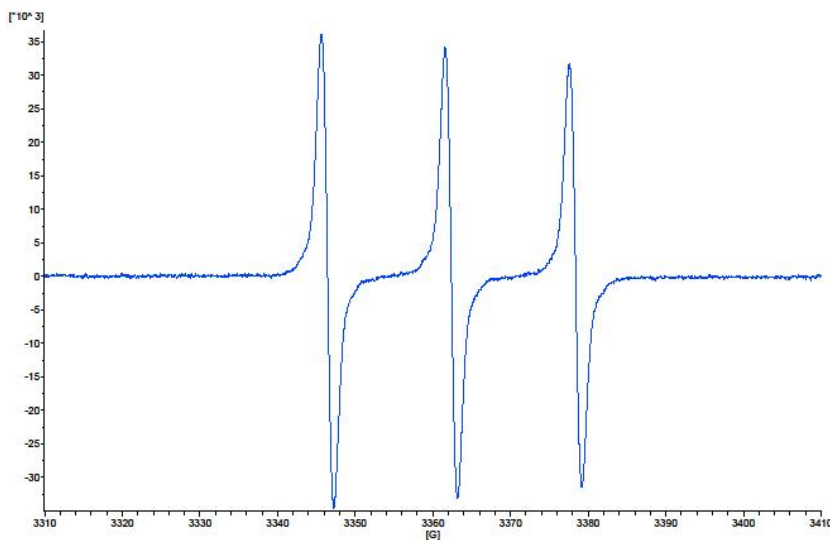

| Parameter List        |                  |
|-----------------------|------------------|
| Operator:             | Administrator    |
| Resonator:            | c:\_ins0526ic.ca |
| Acq. Date:            | 12/13/2013       |
| # of Scans:           | 1                |
| <b>Field</b>          |                  |
| Center Field:         | 3360.000 G       |
| Sweep Width:          | 100.000 G        |
| Resolution:           | 1500 points      |
| <b>Microwave</b>      |                  |
| Frequency:            | 9.444 GHz        |
| Power:                | 2.430 mW         |
| <b>Receiver</b>       |                  |
| Receiver Gain:        | 2.00e+002        |
| Phase:                | 0.00 deg         |
| Harmonic:             | 1                |
| Mod. Frequency:       | 100.00 kHz       |
| Mod. Amplitude:       | 1.00 G           |
| <b>Signal Channel</b> |                  |
| Conversion:           | 40.000 ms        |
| Time Constant:        | 5.120 ms         |
| Sweep Time:           | 60.000 s         |



WINEPR Acquisition

Date: 12/13/2013 Time: 17:38

FileName: C:\Documents and Settings\Administrator\Desktop\LYX-Yuanbi+3mgTEMPO-xishi.par

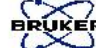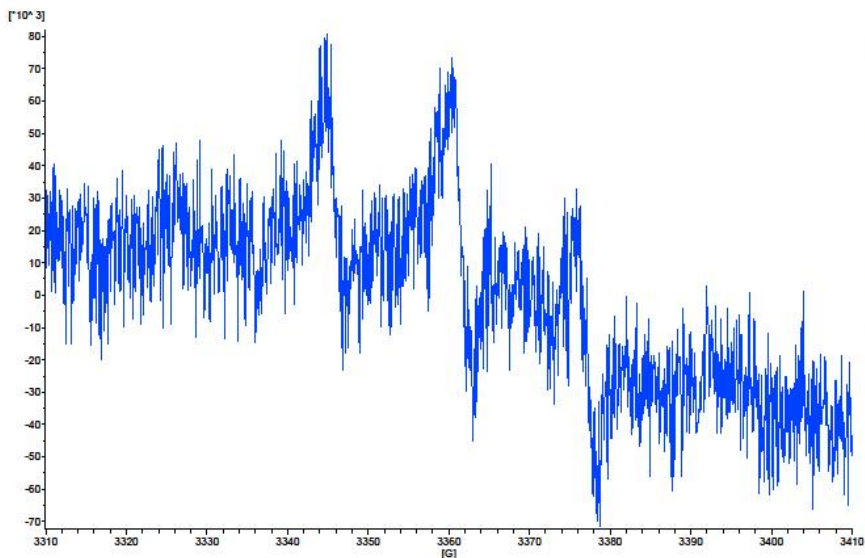

| Parameter List        |                |
|-----------------------|----------------|
| Operator:             | Administrator  |
| Resonator:            | c:\_h0526ic.ca |
| Acq. Date:            | 12/13/2013     |
| # of Scans:           | 1              |
| <b>Field</b>          |                |
| Center Field:         | 3360.000 G     |
| Sweep Width:          | 100.000 G      |
| Resolution:           | 1500 points    |
| <b>Microwave</b>      |                |
| Frequency:            | 9.442 GHz      |
| Power:                | 24.396 mW      |
| <b>Receiver</b>       |                |
| Receiver Gain:        | 2.00e+004      |
| Phase:                | 0.00 deg       |
| Harmonic:             | 1              |
| Mod. Frequency:       | 100.00 kHz     |
| Mod. Amplitude:       | 1.00 G         |
| <b>Signal Channel</b> |                |
| Conversion:           | 40.000 ms      |
| Time Constant:        | 10.240 ms      |
| Sweep Time:           | 60.000 s       |

WINEPR Acquisition

Date: 12/13/2013 Time: 17:17

FileName: C:\Documents and Settings\Administrator\Desktop\TEMPO.par

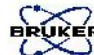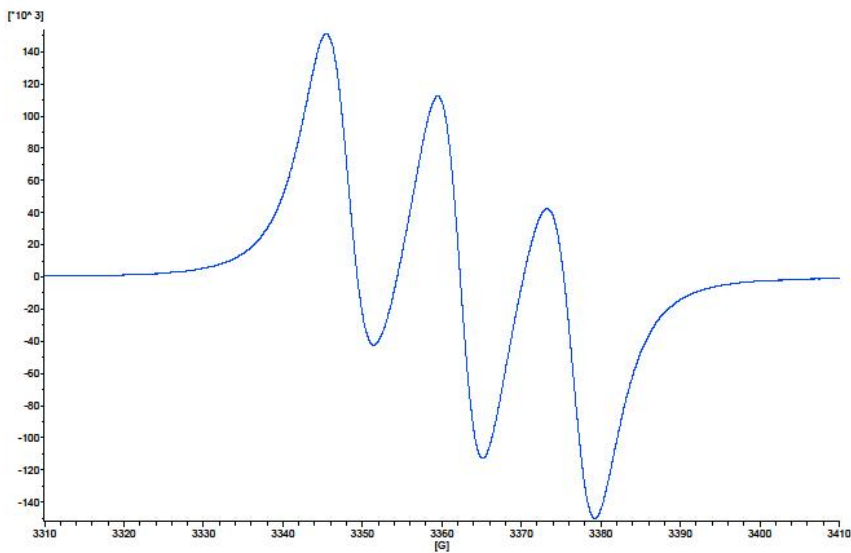

| Parameter List        |                |
|-----------------------|----------------|
| Operator:             | Administrator  |
| Resonator:            | c:\_h0526ic.ca |
| Acq. Date:            | 12/13/2013     |
| # of Scans:           | 1              |
| <b>Field</b>          |                |
| Center Field:         | 3360.000 G     |
| Sweep Width:          | 100.000 G      |
| Resolution:           | 1500 points    |
| <b>Microwave</b>      |                |
| Frequency:            | 9.445 GHz      |
| Power:                | 24.469 mW      |
| <b>Receiver</b>       |                |
| Receiver Gain:        | 2.00e+001      |
| Phase:                | 0.00 deg       |
| Harmonic:             | 1              |
| Mod. Frequency:       | 100.00 kHz     |
| Mod. Amplitude:       | 1.00 G         |
| <b>Signal Channel</b> |                |
| Conversion:           | 40.000 ms      |
| Time Constant:        | 5.120 ms       |
| Sweep Time:           | 60.000 s       |
